# Supplementary material for: Discovery of novel thiazolyl-pyrazolines as dual EGFR and VEGFR-2 inhibitors endowed with in vitro antitumor activity towards non-small lung cancer
Source: PubMed Central journal article supplement (PMC9415638; doi:10.1080/14756366.2022.2104841), 2022-08-23
Supplement: IENZ_A_2104841_SM4599.pdf [file IENZ_A_2104841_SM4599.pdf]

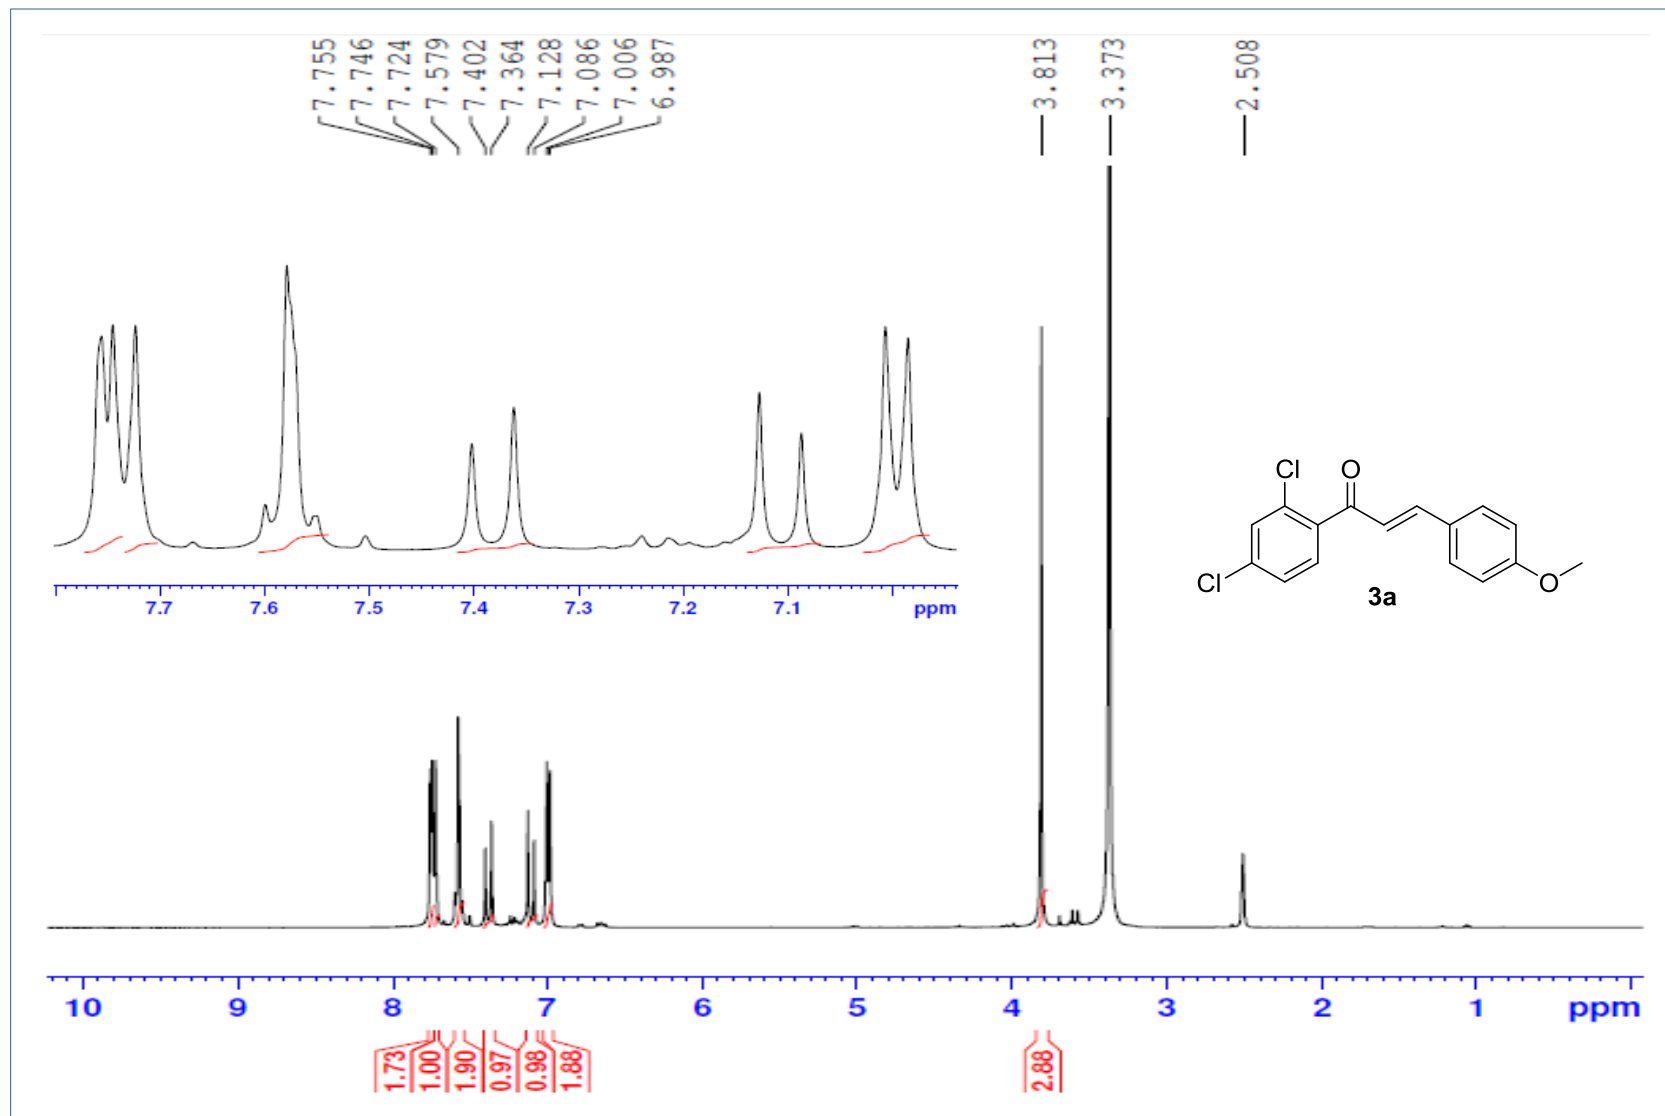

**Appendix (1):**  $^1\text{H}$  NMR spectrum of compound **3a** ( $\text{DMSO-}d_6$ , 400 MHz).

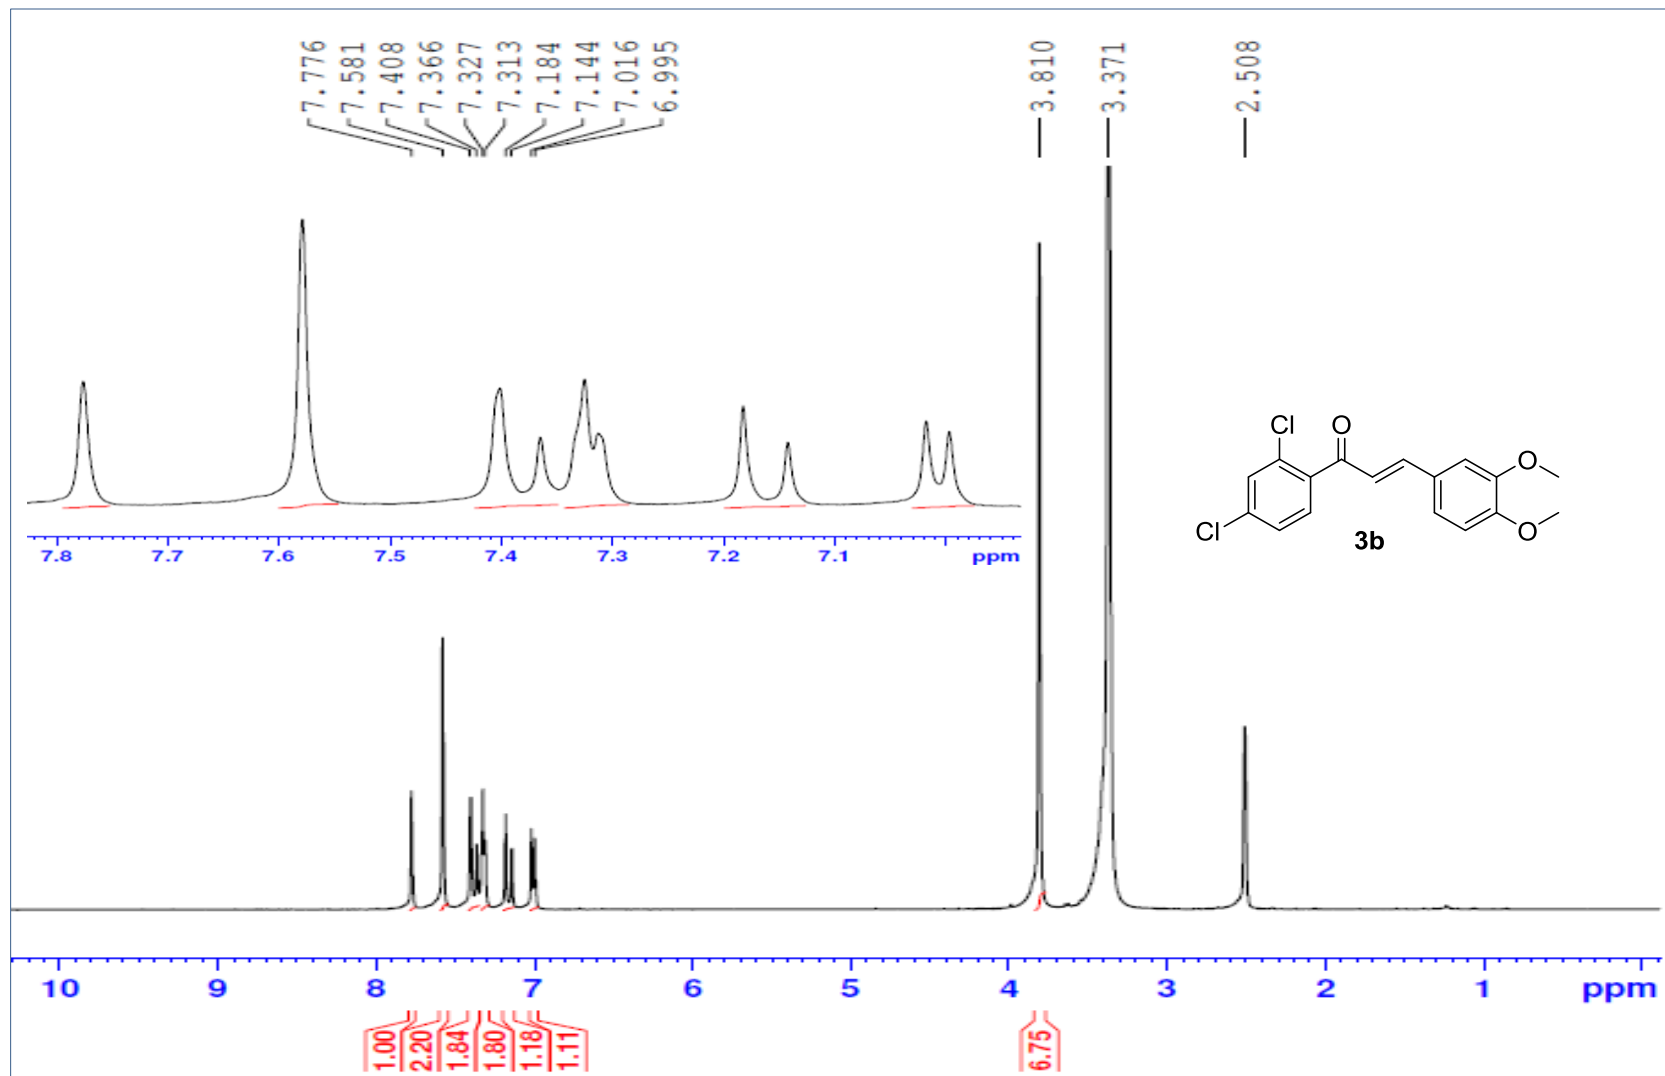

Appendix (2):  $^1\text{H}$  NMR spectrum of compound **3b** ( $\text{DMSO-}d_6$ , 400 MHz).

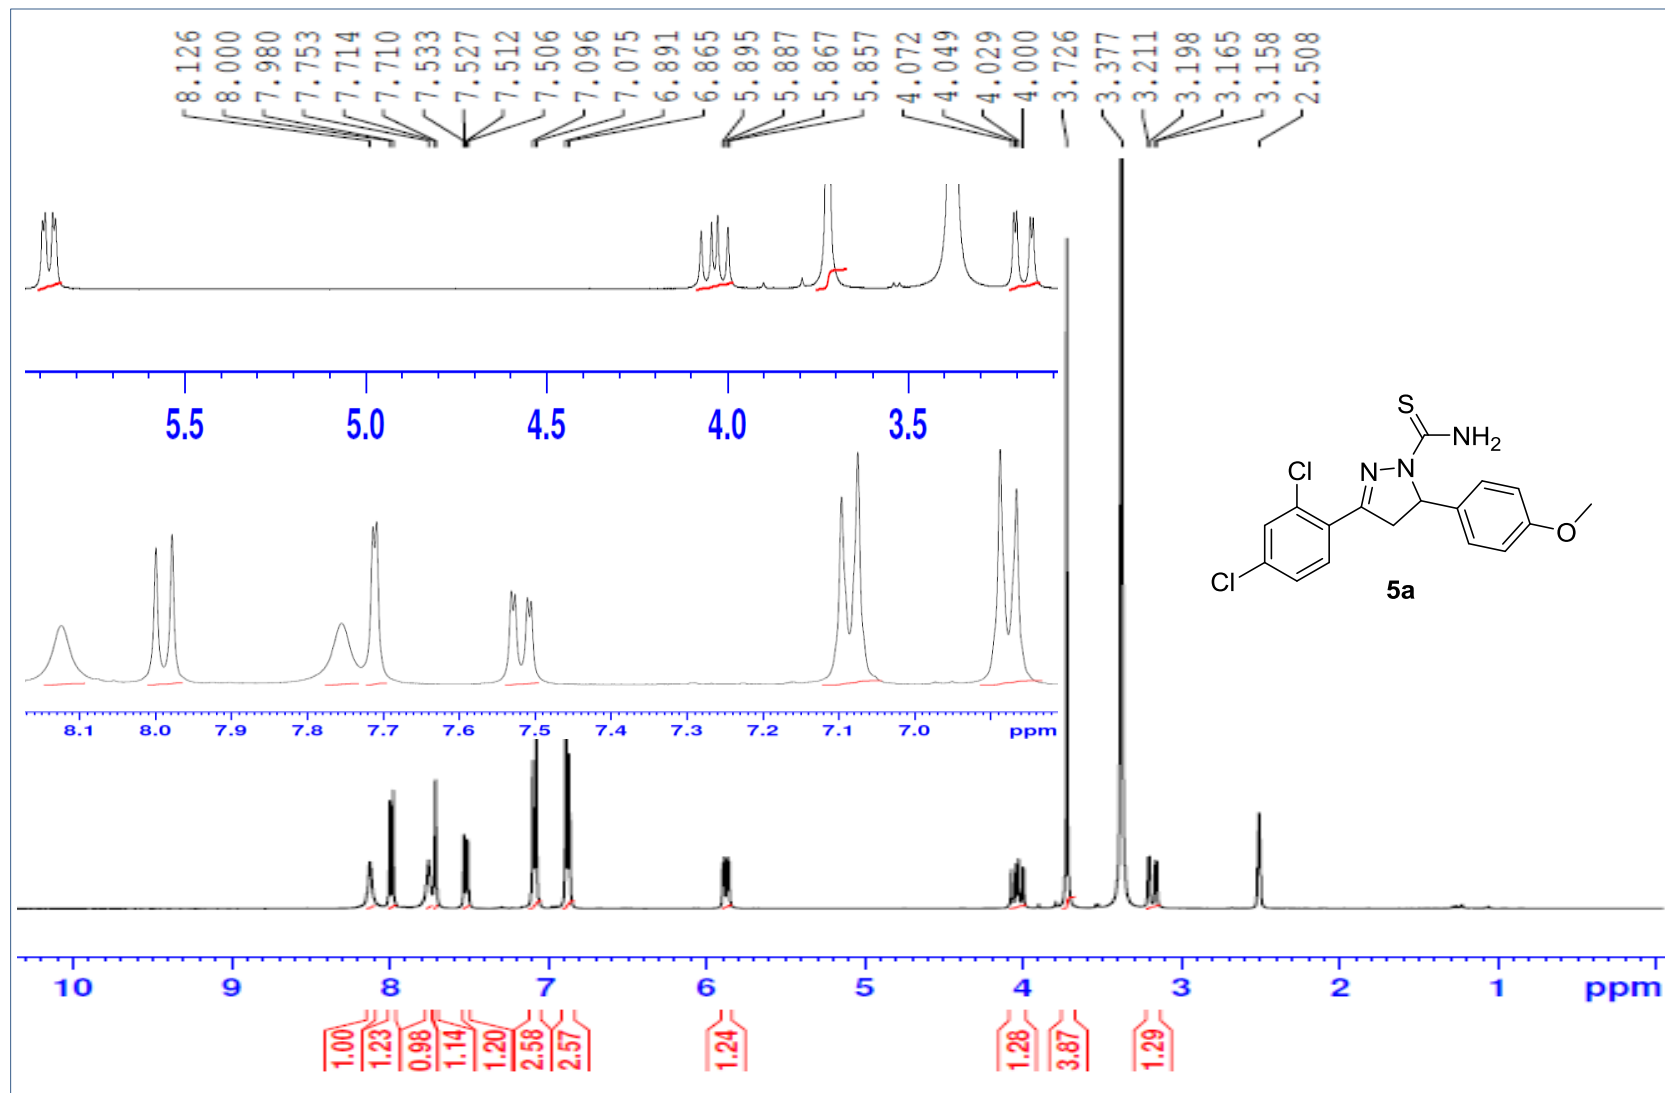

**Appendix (3):**  $^1\text{H}$  NMR spectrum of compound **5a** ( $\text{DMSO-}d_6$ , 400 MHz).

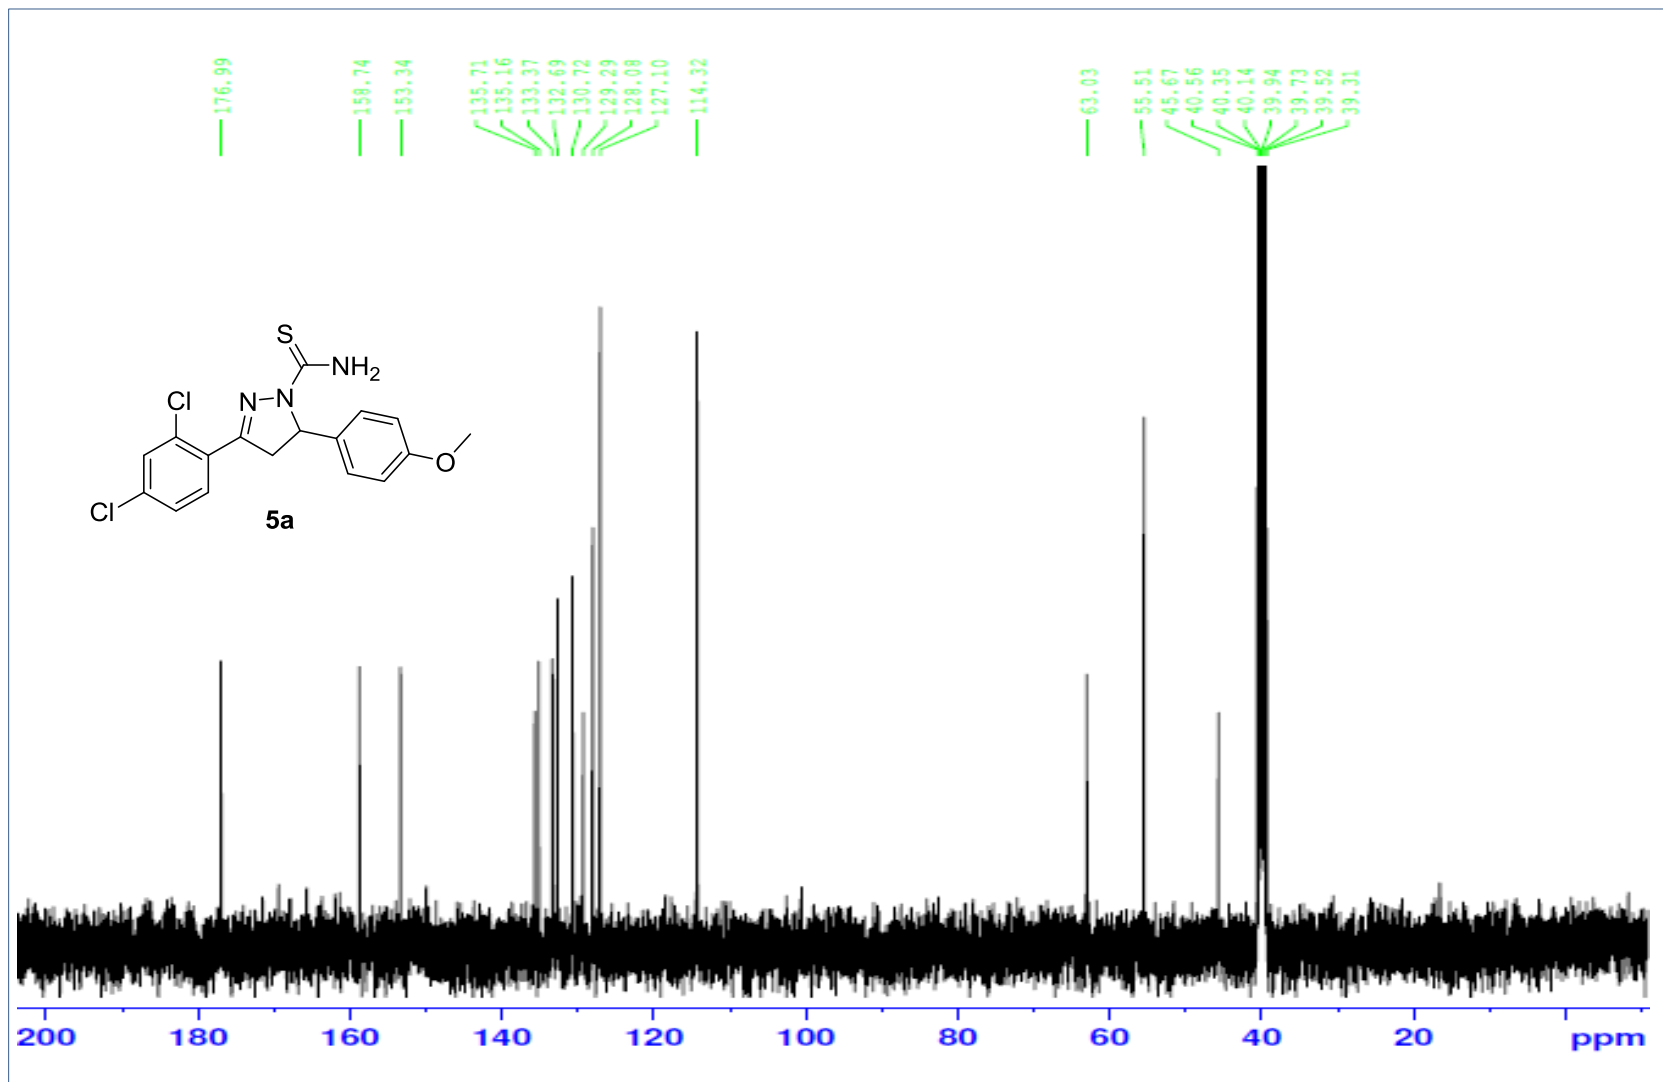

**Appendix (4):**  $^{13}\text{C}$  NMR spectrum of compound **5a** ( $\text{DMSO}-d_6$ , 100 MHz).

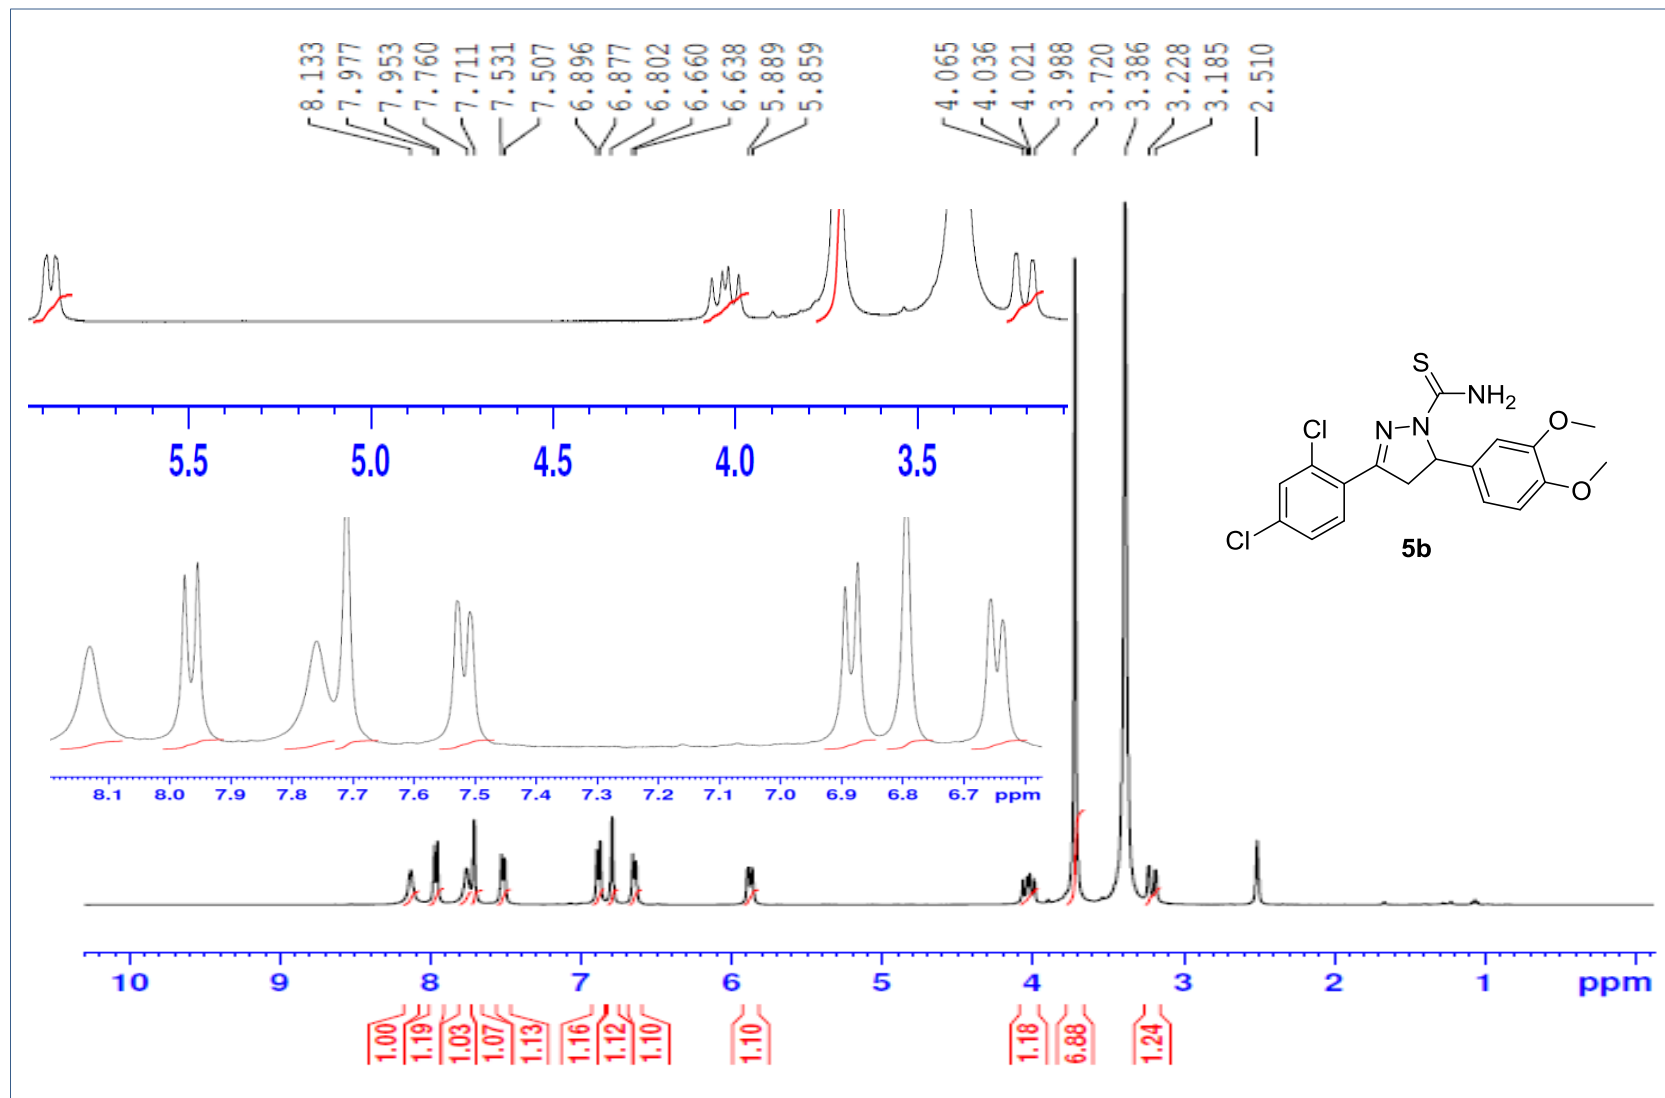

**Appendix (5):**  $^1\text{H}$  NMR spectrum of compound **5b** (DMSO- $d_6$ , 400 MHz).

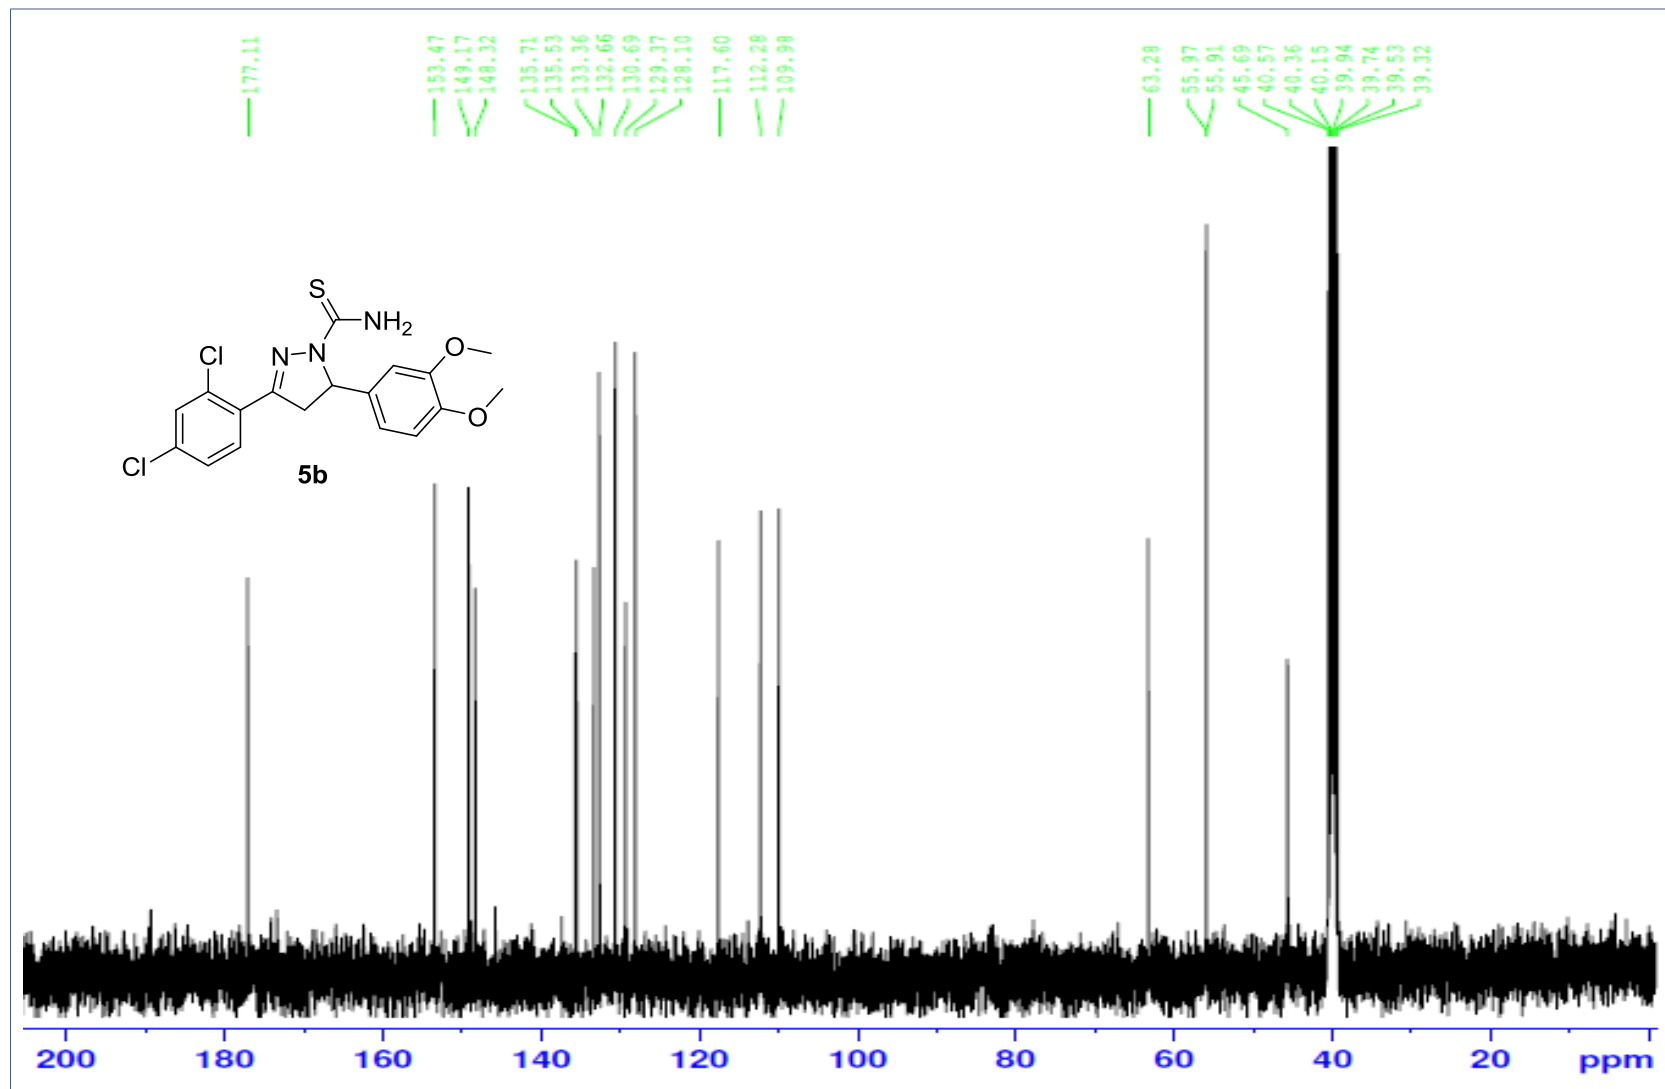

Appendix (6):  $^{13}\text{C}$  NMR spectrum of compound **5b** ( $\text{DMSO-}d_6$ , 100 MHz).

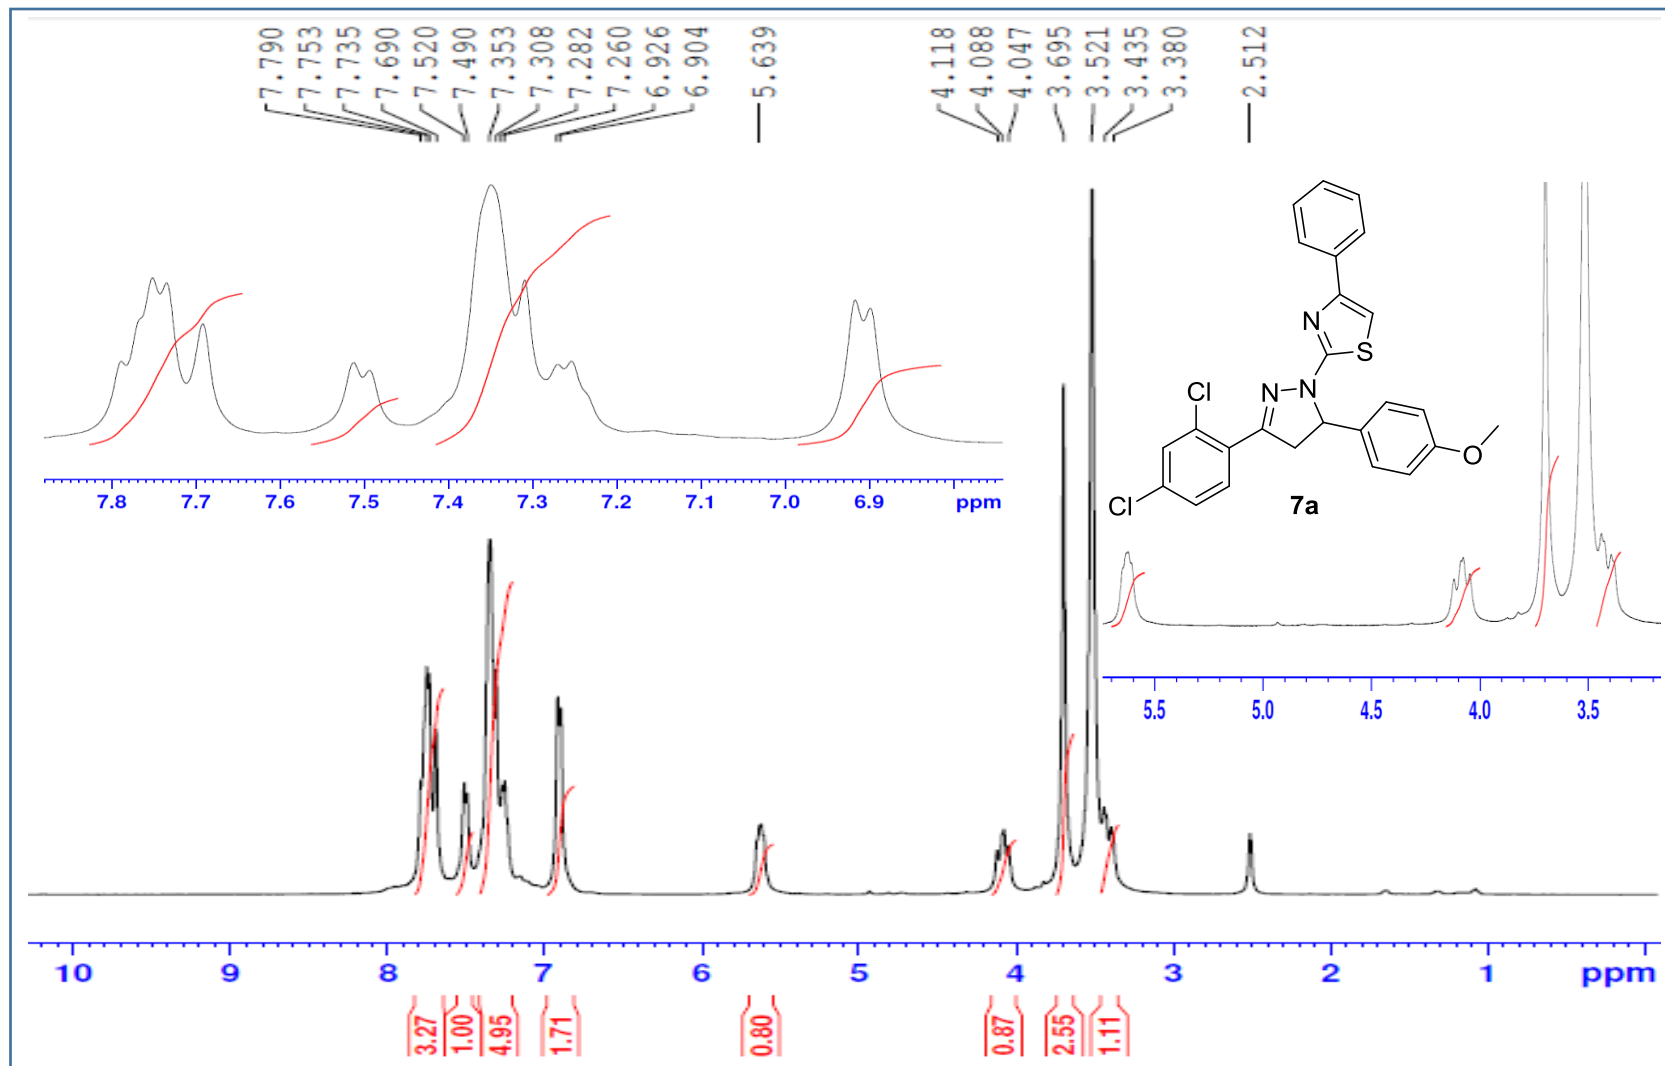

**Appendix (7):**  $^1\text{H}$  NMR spectrum of compound **7a** (DMSO- $d_6$ , 400 MHz).

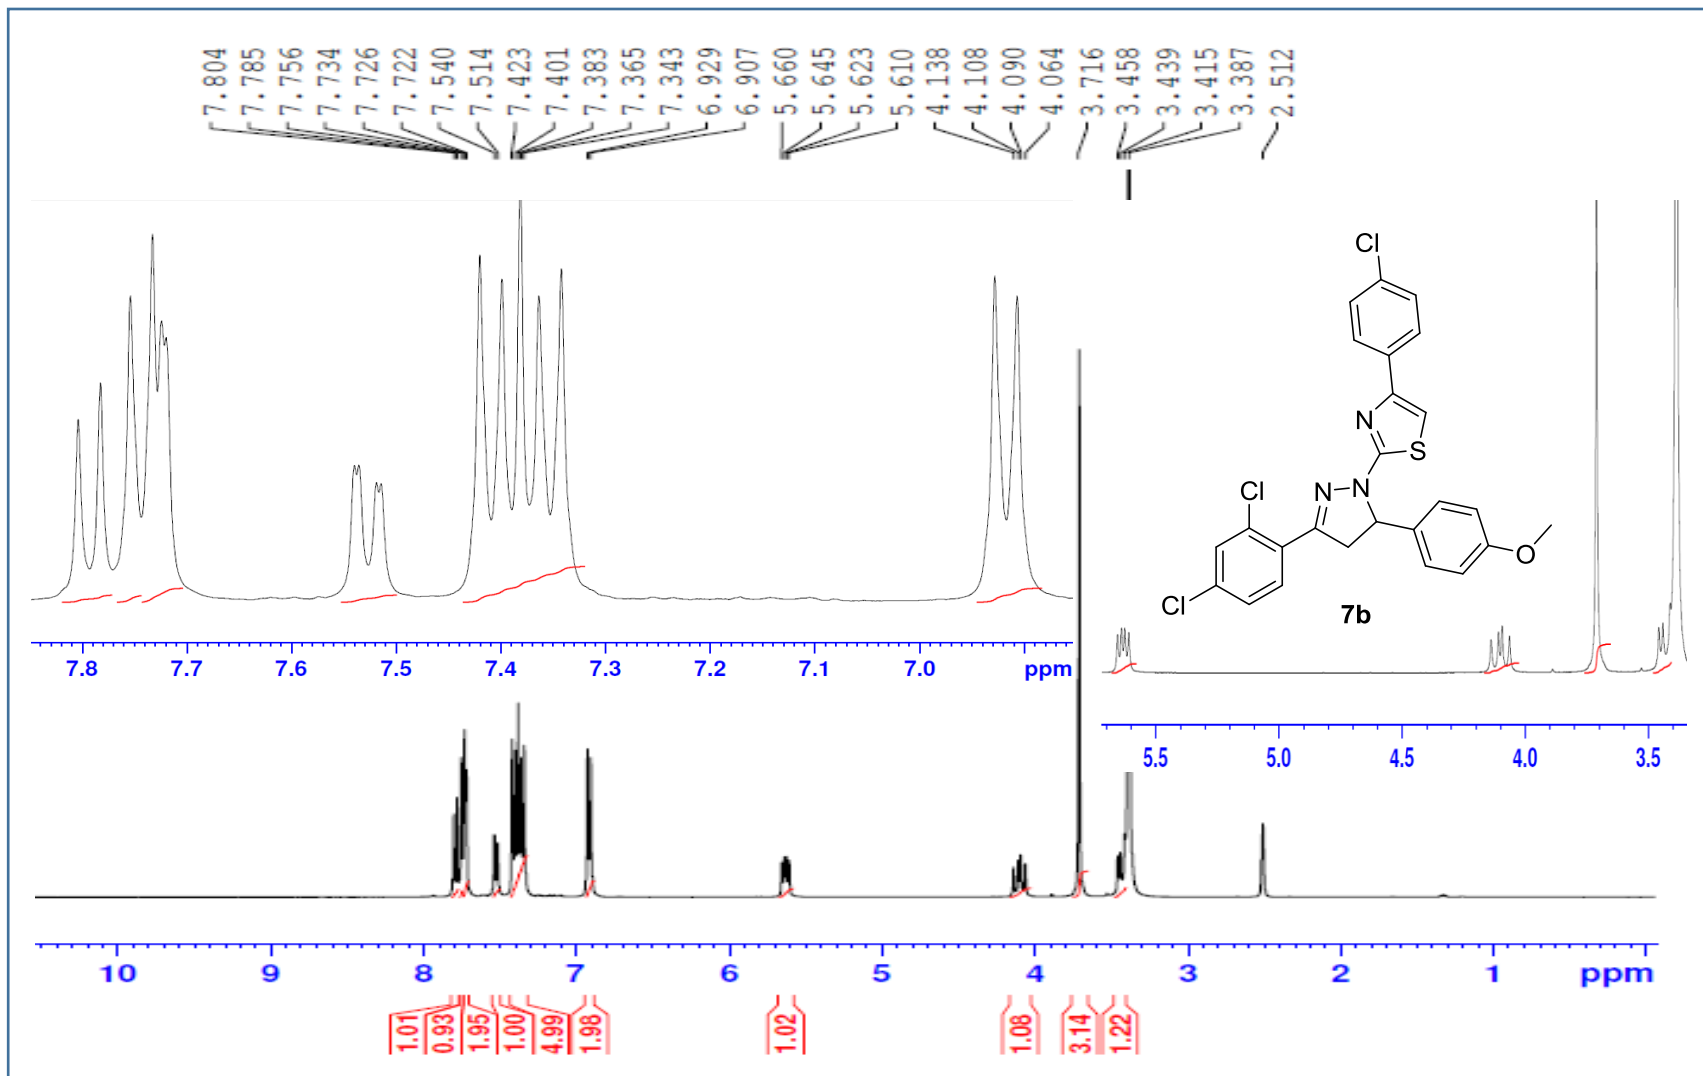

Appendix (8):  $^1\text{H}$  NMR spectrum of compound **7b** (DMSO- $d_6$ , 400 MHz).



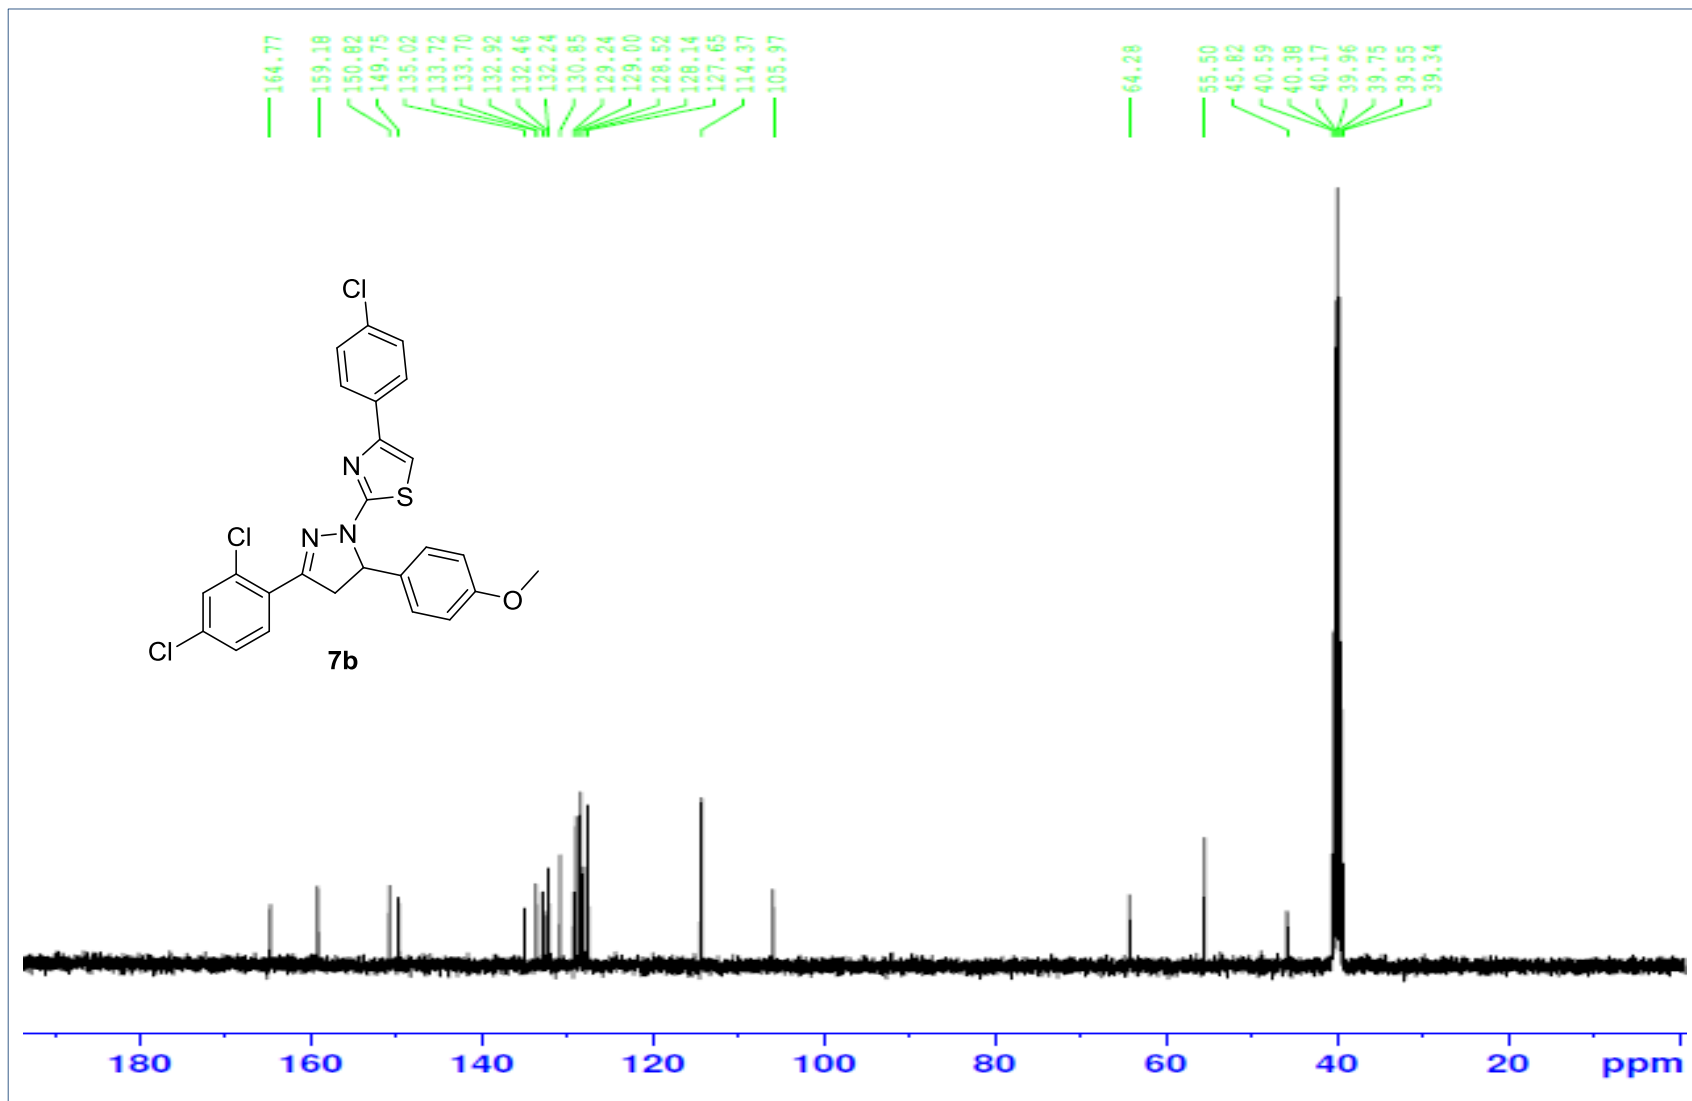

**Appendix (9):**  $^{13}\text{C}$  NMR spectrum of compound **7b** (DMSO- $d_6$ , 100 MHz).

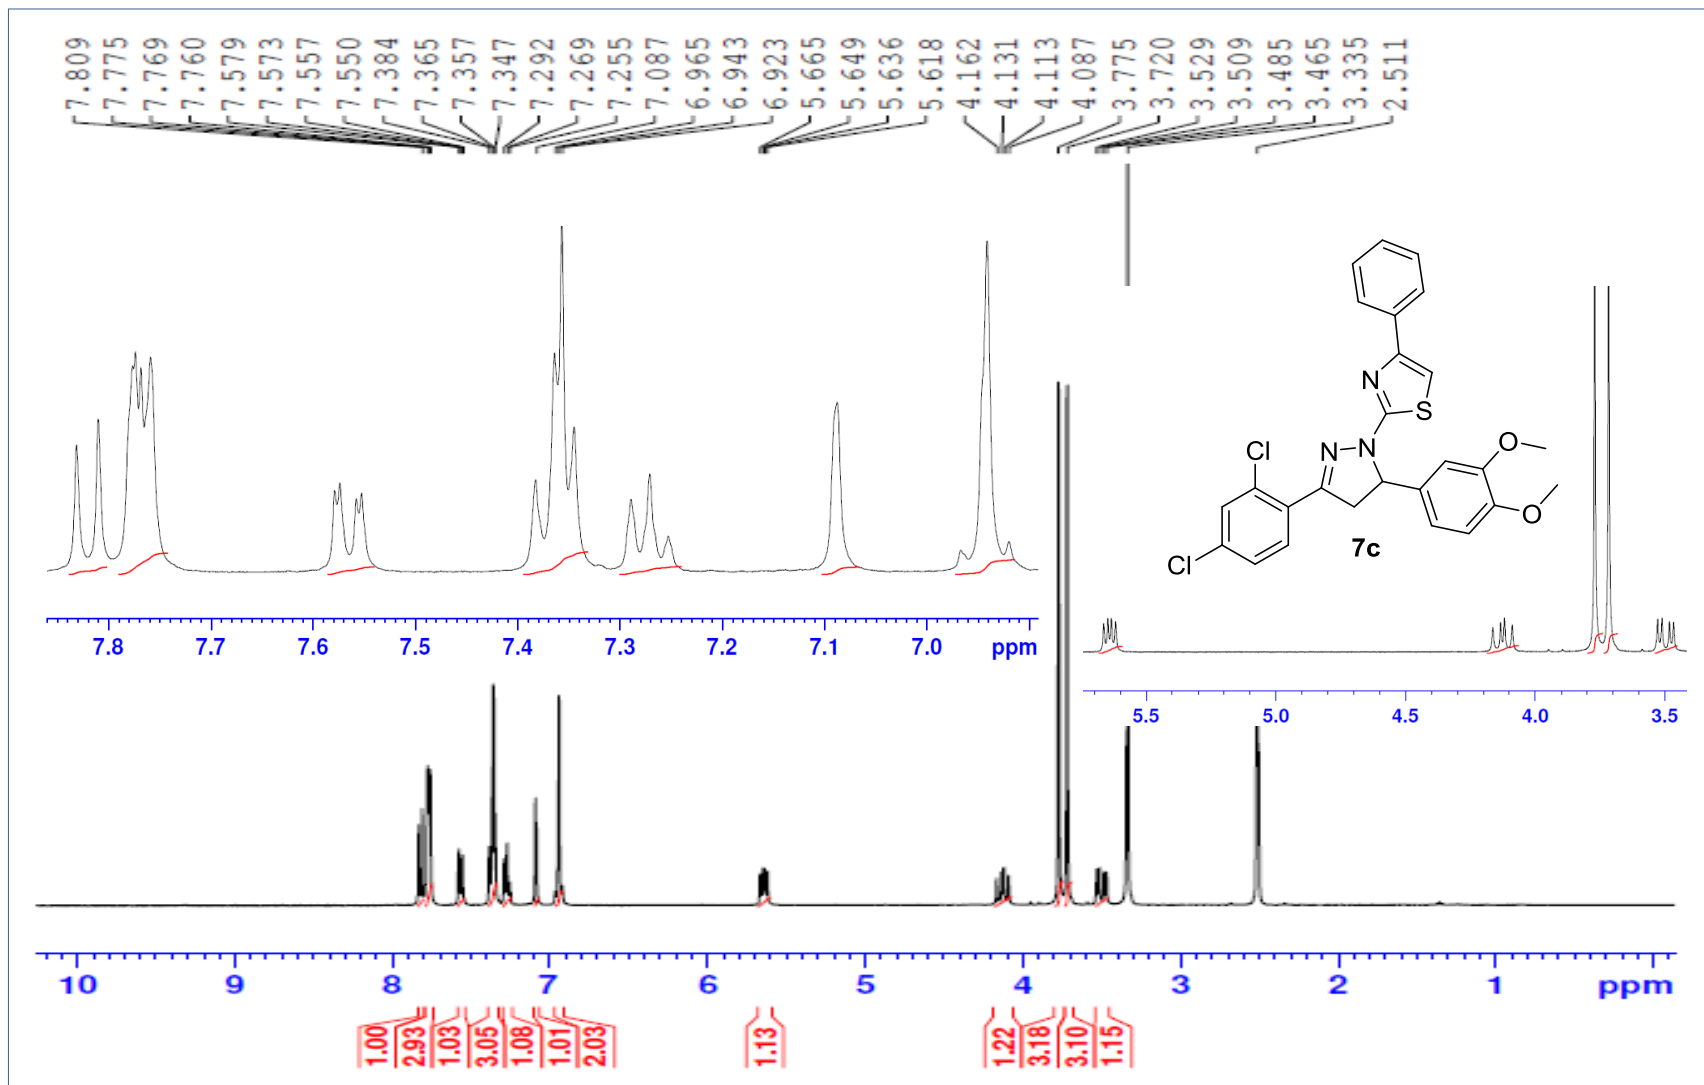

Appendix (10):  $^1\text{H}$  NMR spectrum of compound **7c** (DMSO- $d_6$ , 400 MHz).

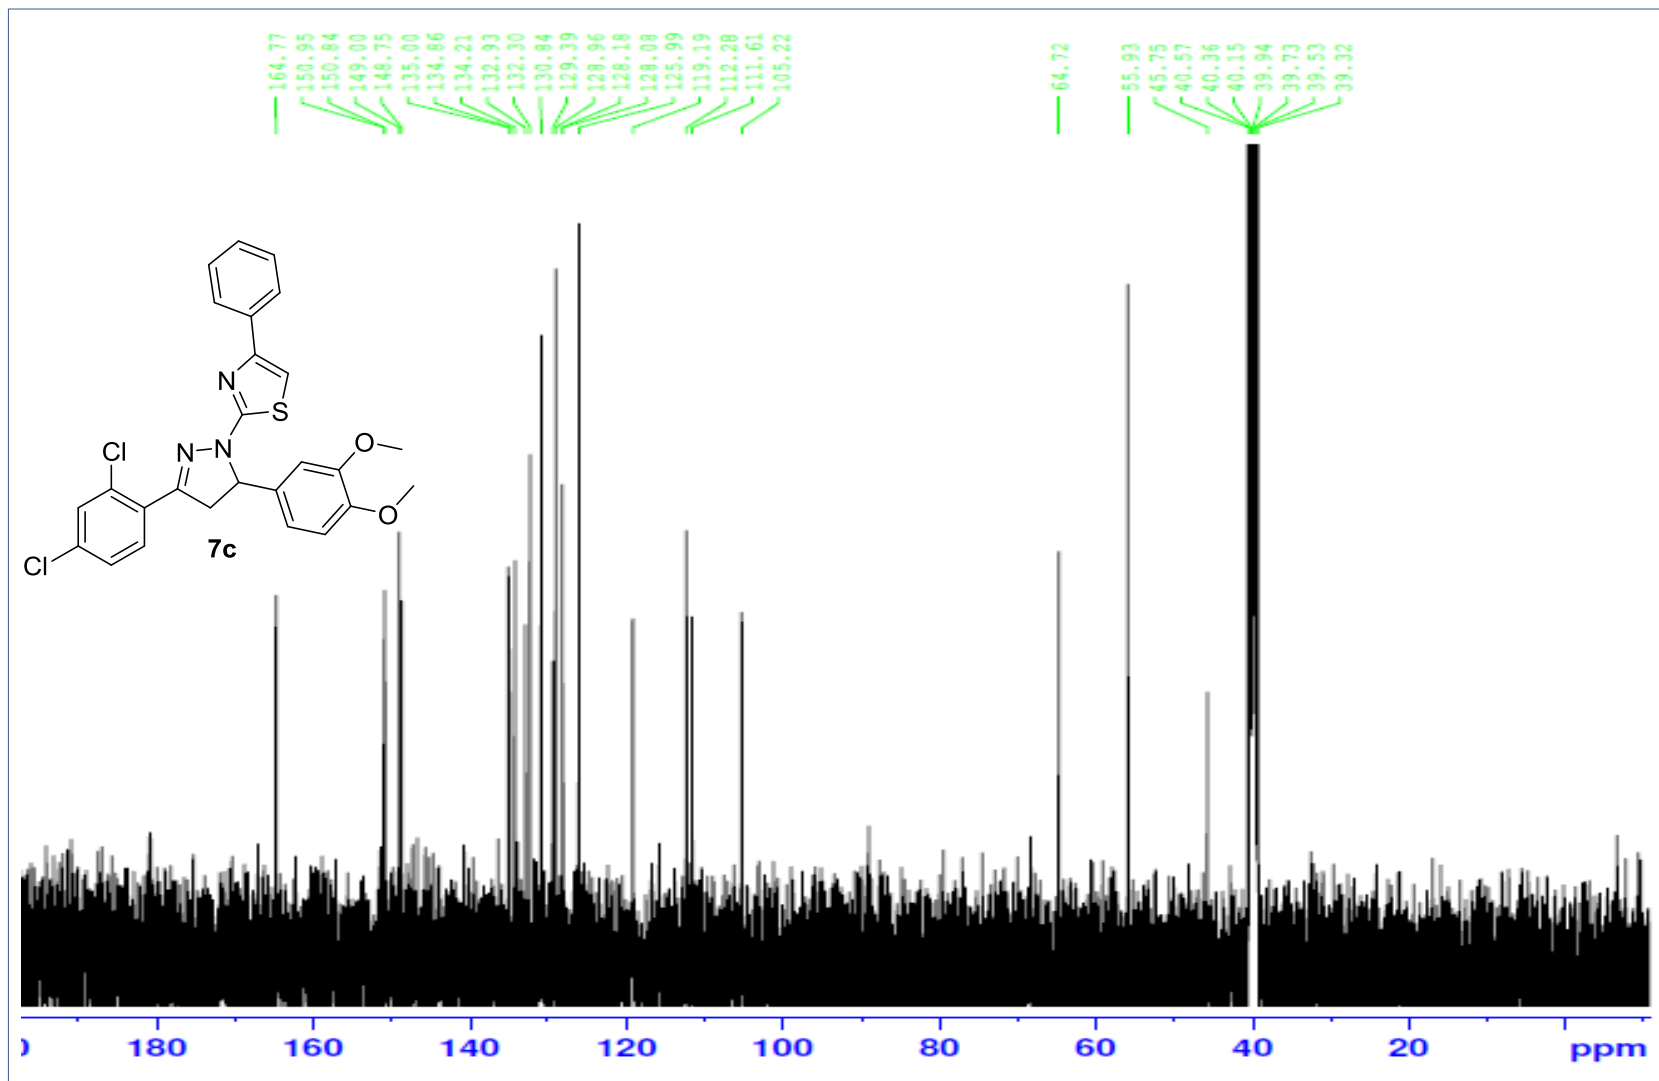

Appendix (11):  $^{13}\text{C}$  NMR spectrum of compound **7c** ( $\text{DMSO-}d_6$ , 100 MHz).

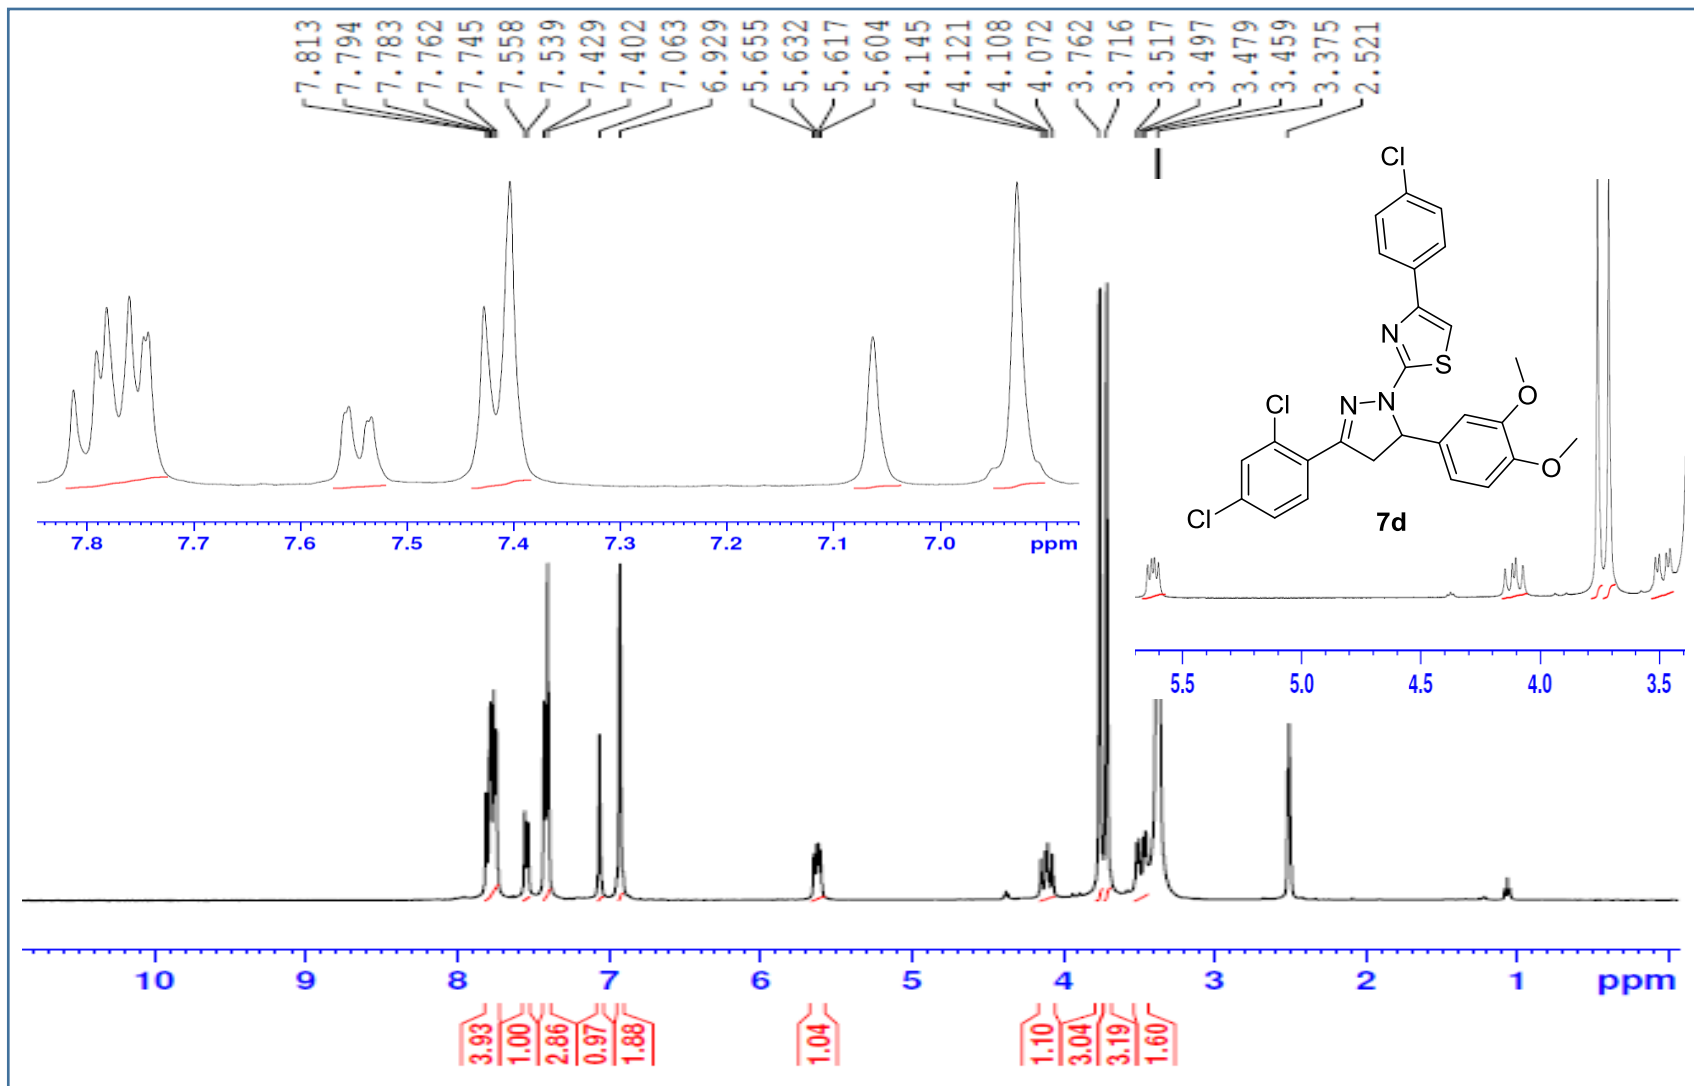

**Appendix (12):**  $^1\text{H}$  NMR spectrum of compound **7d** ( $\text{DMSO-}d_6$ , 400 MHz).

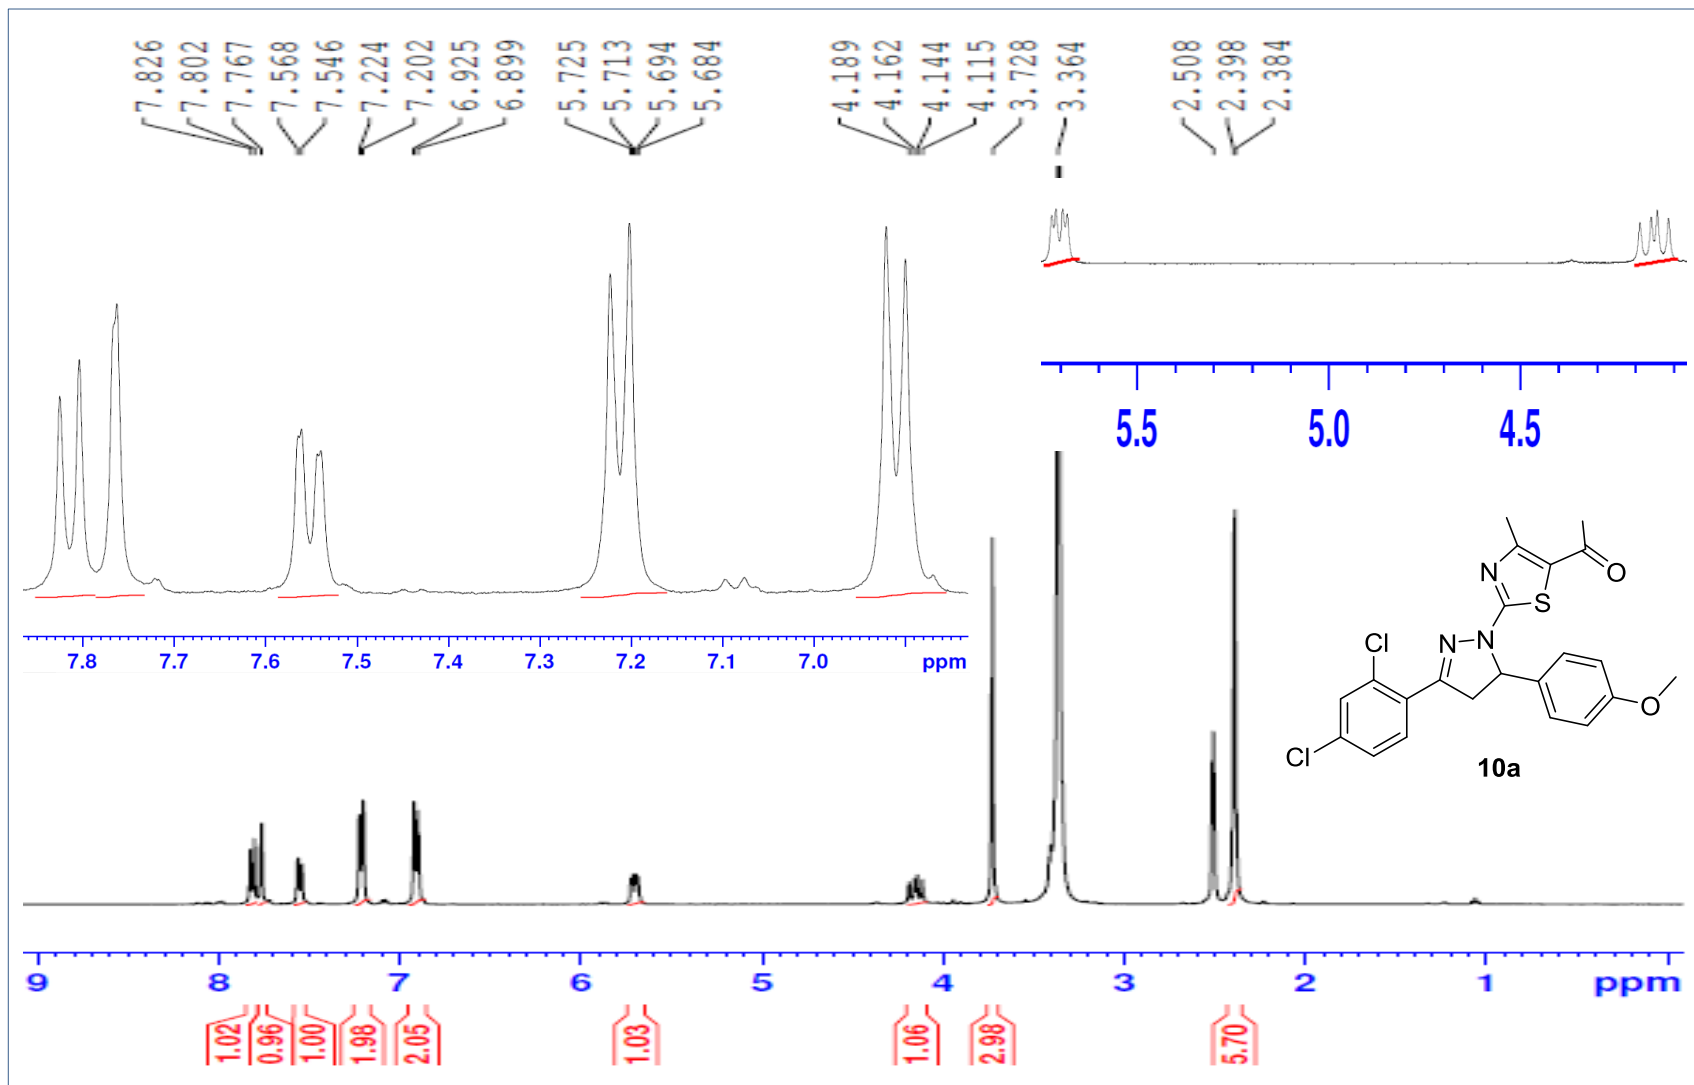

Appendix (13):  $^1\text{H}$  NMR spectrum of compound **10a** (DMSO- $d_6$ , 400 MHz).

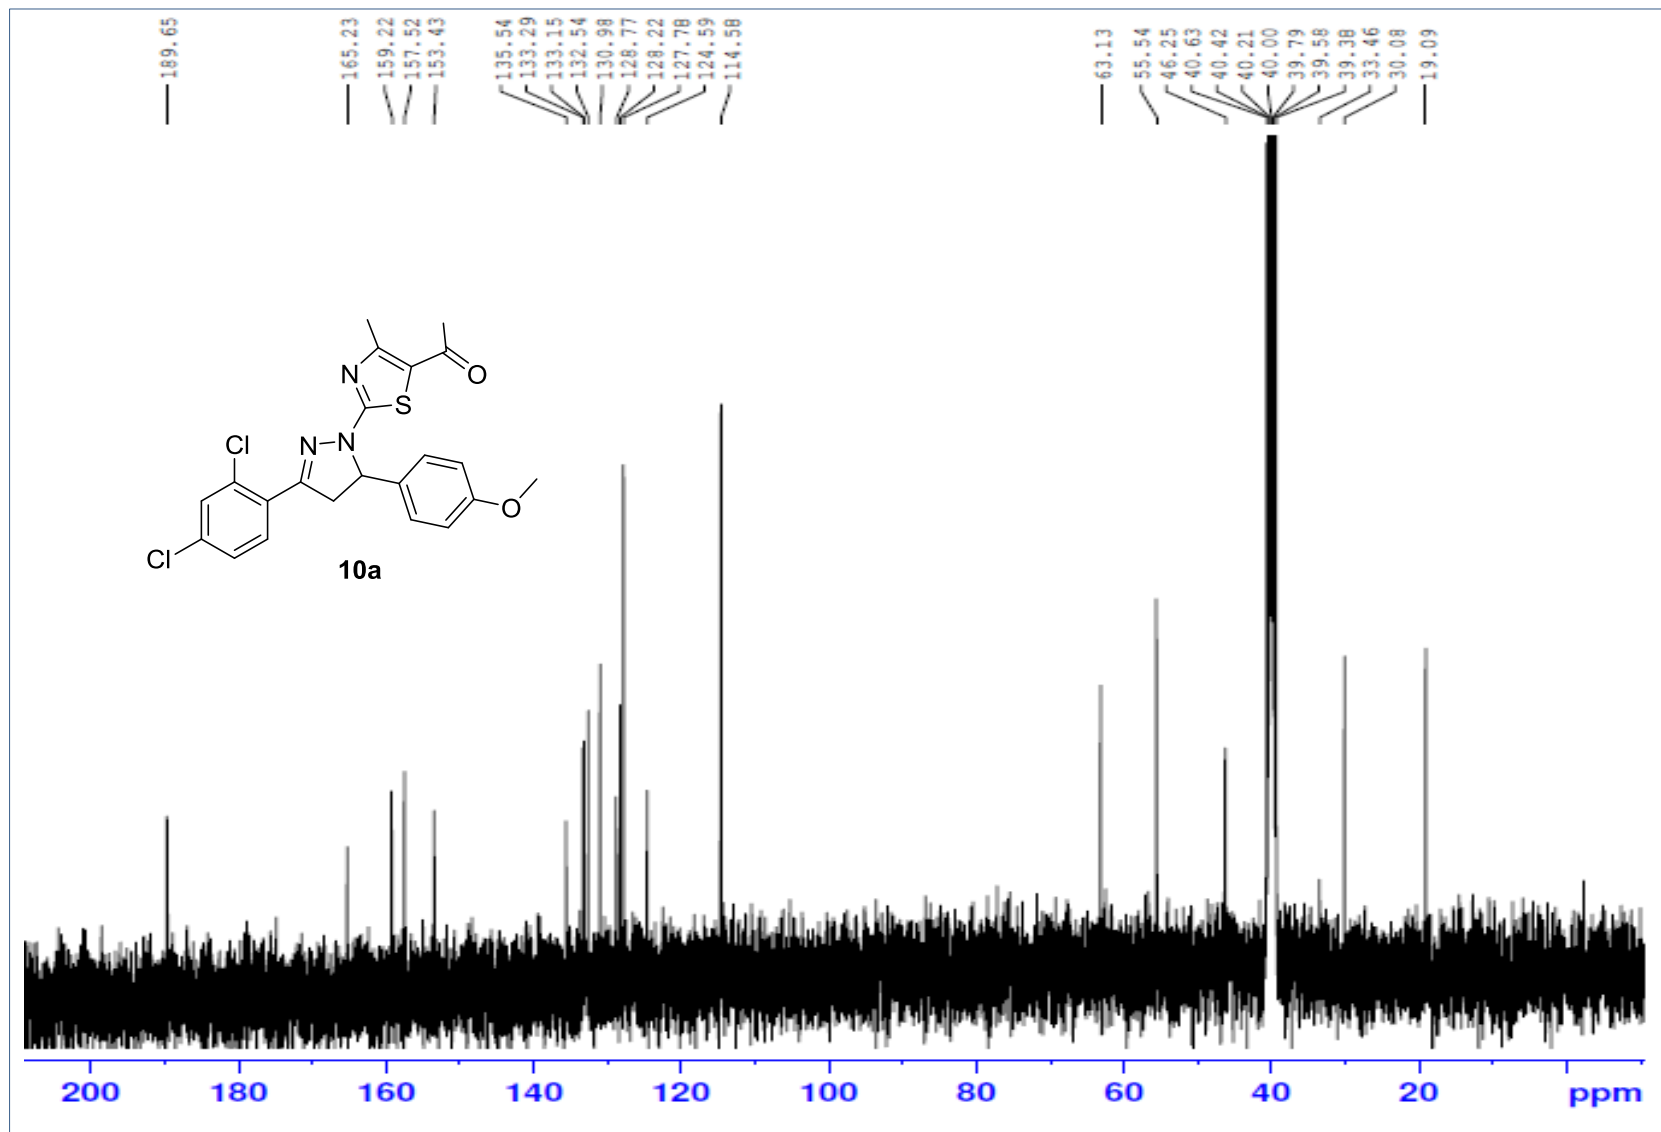

Appendix (14): <sup>13</sup>C NMR spectrum of compound **10a** (DMSO-*d*<sub>6</sub>, 100 MHz).

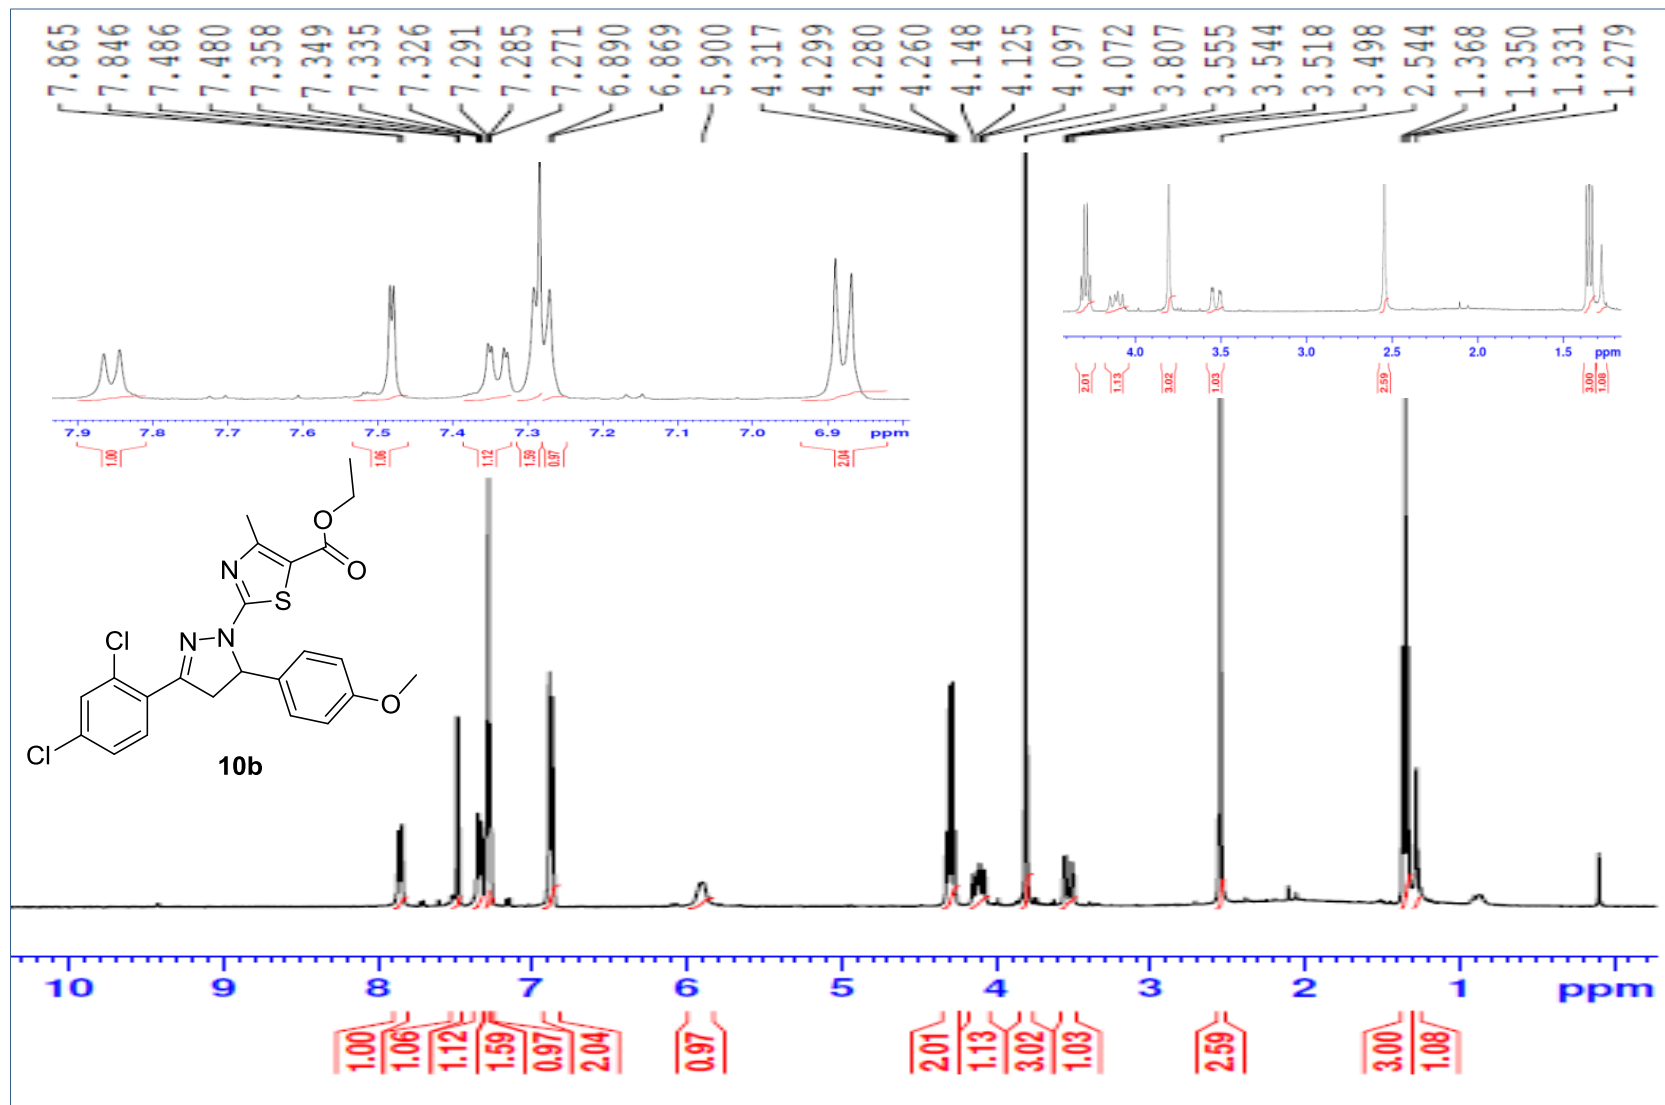

Appendix (15):  $^1\text{H}$  NMR spectrum of compound **10b** ( $\text{CDCl}_3$ , 400 MHz).

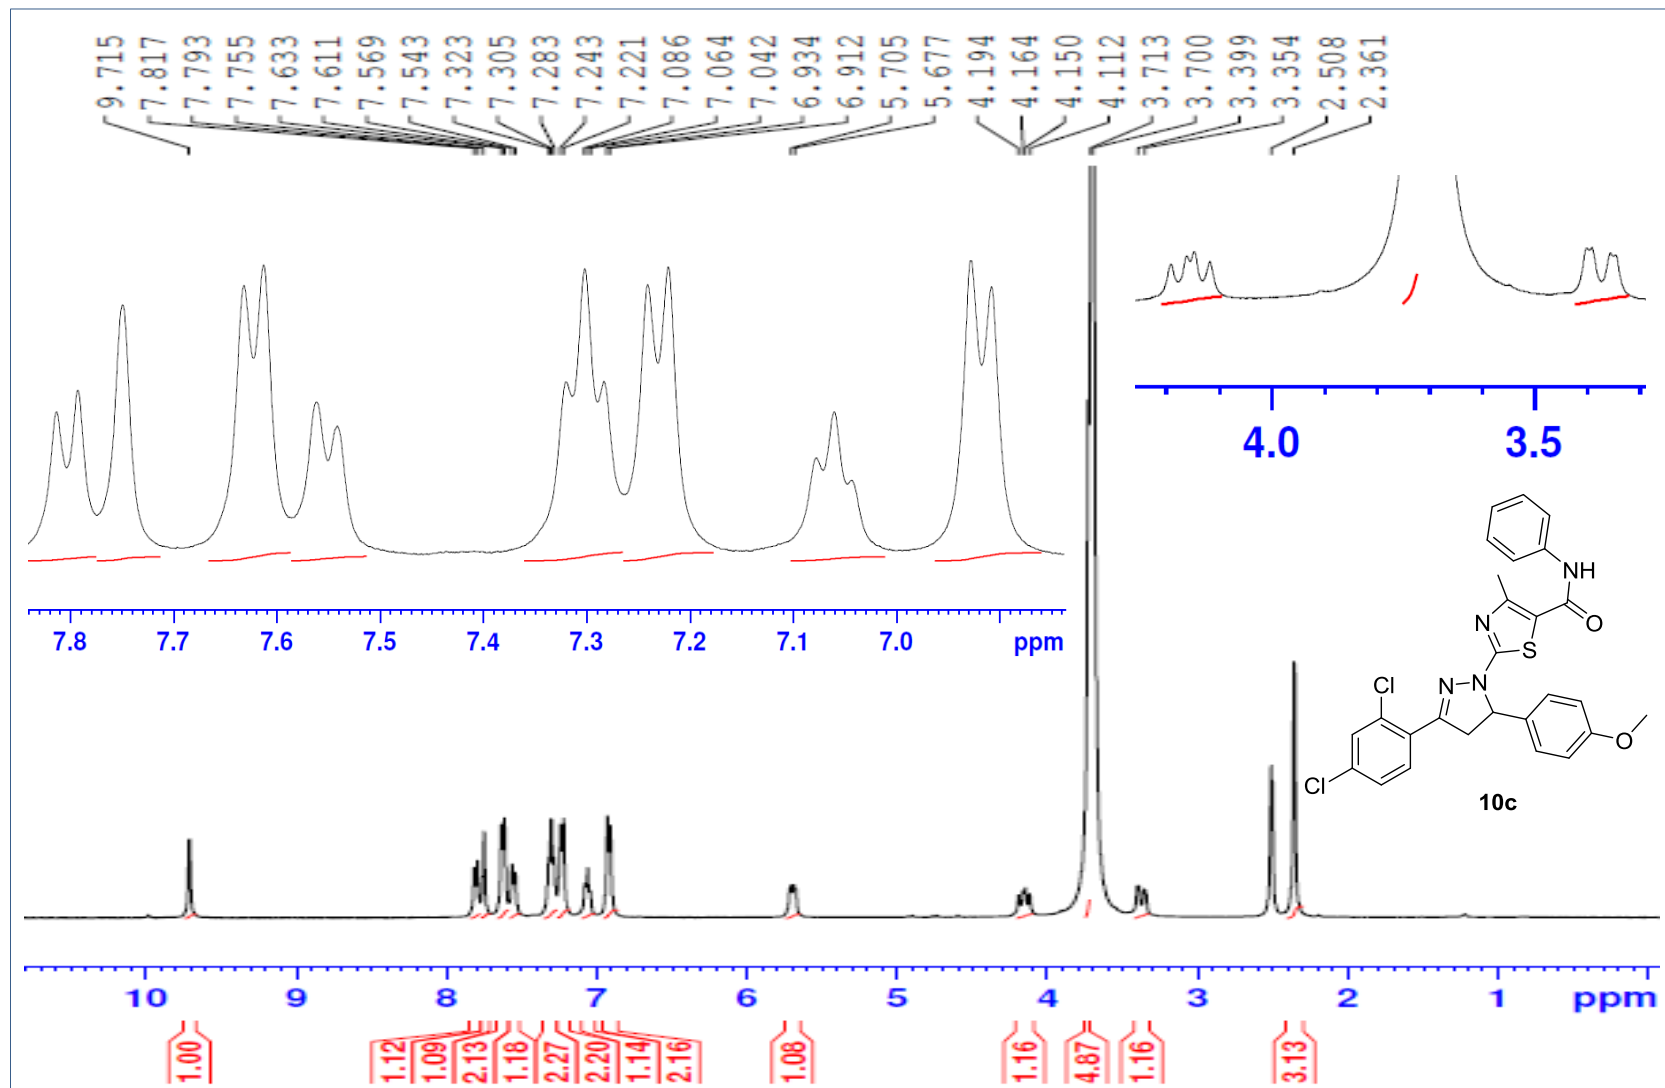

Appendix (16):  $^1\text{H}$  NMR spectrum of compound **10c** ( $\text{DMSO}-d_6$ , 400 MHz).



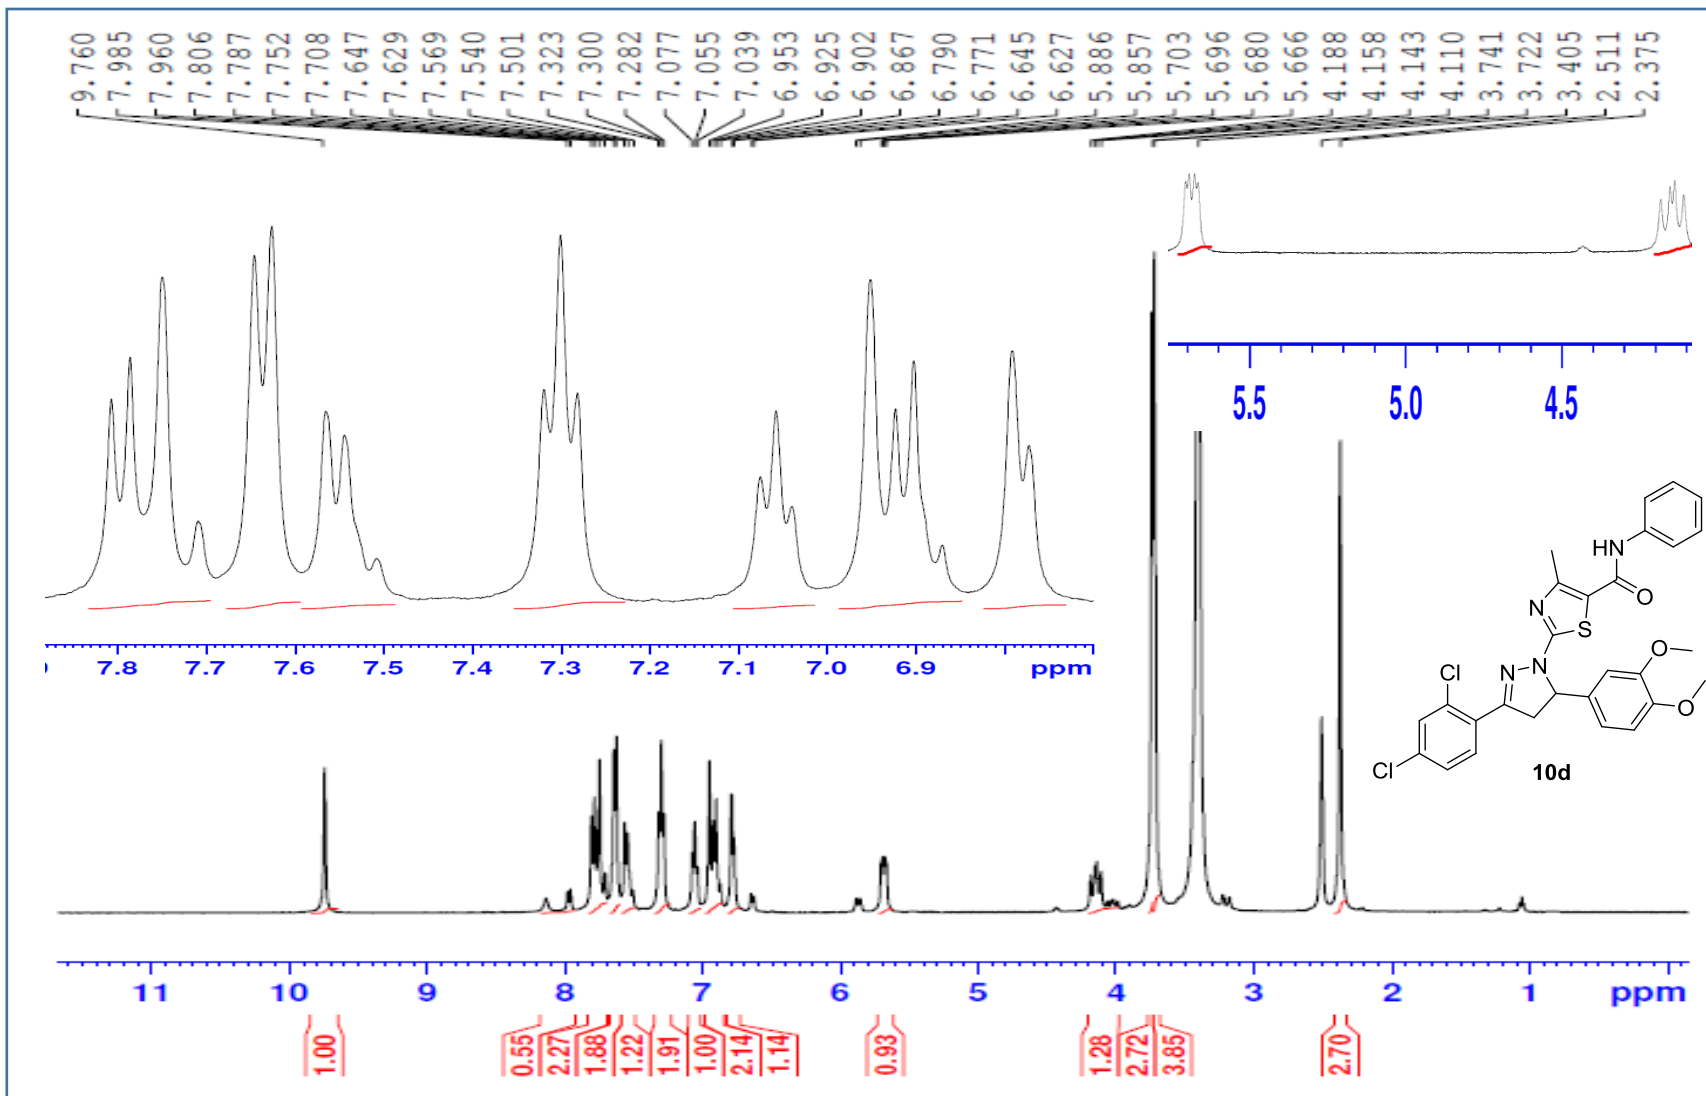

Appendix (17):  $^1\text{H}$  NMR spectrum of compound **10d** ( $\text{DMSO-}d_6$ , 400 MHz).

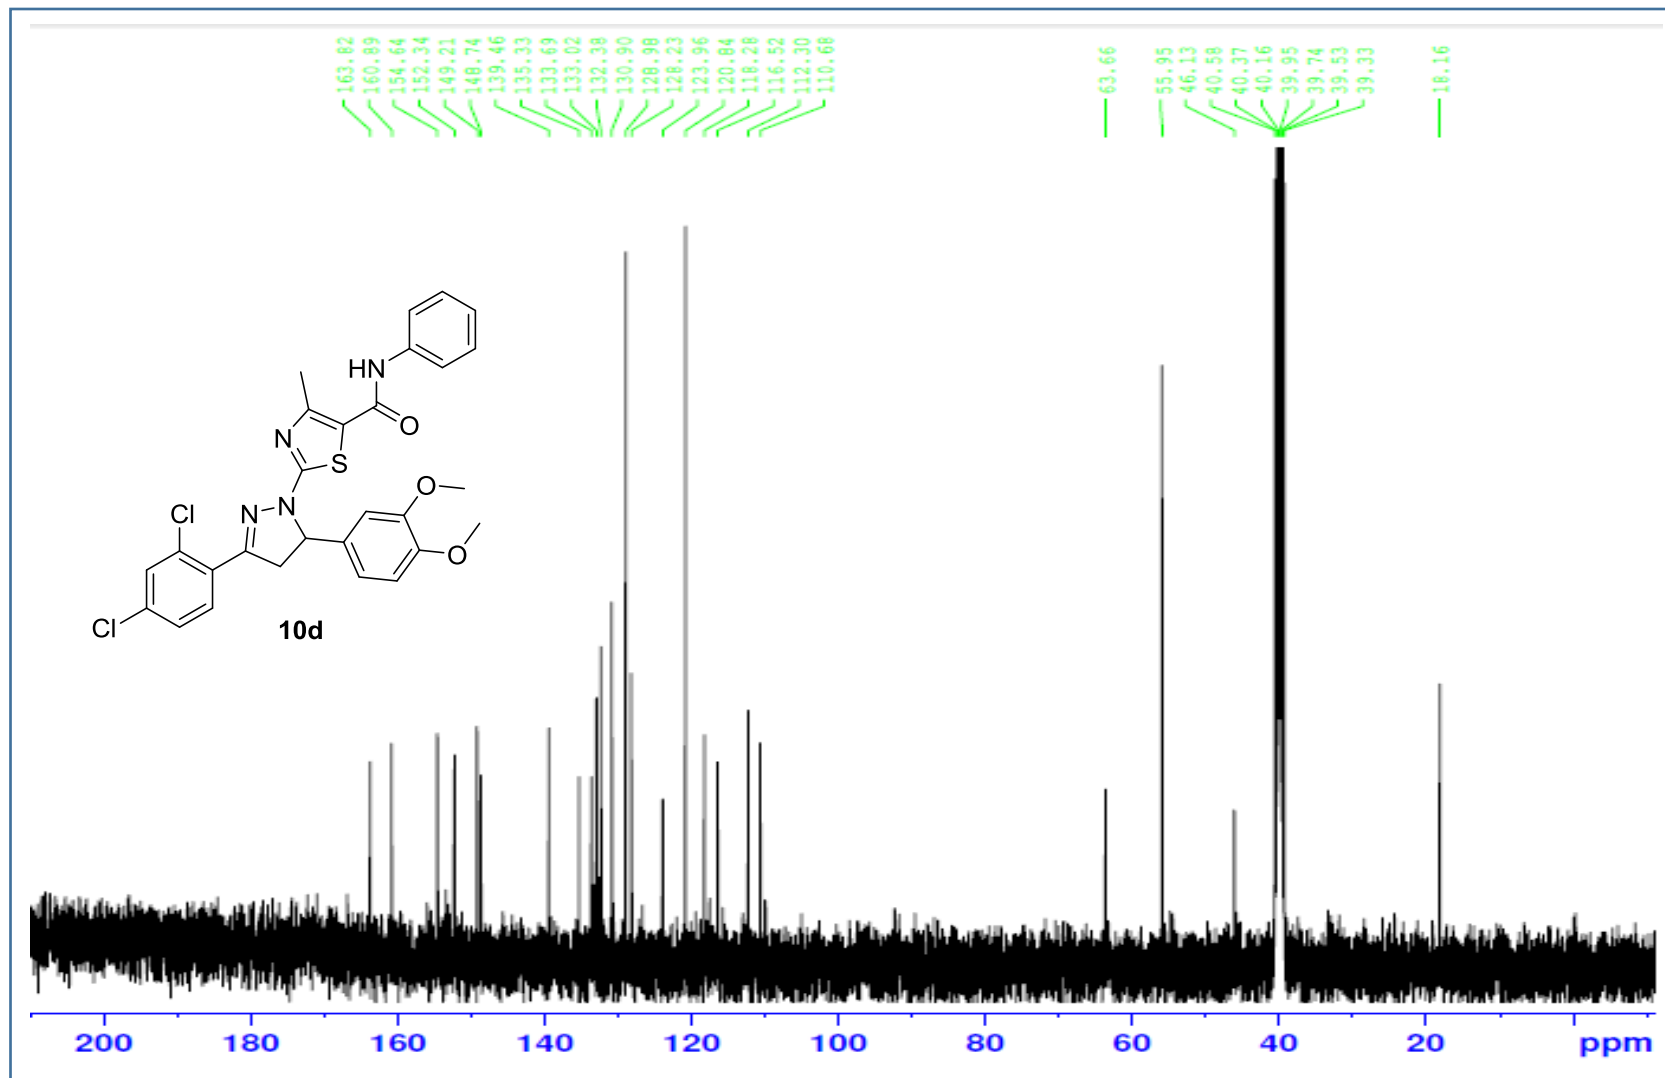

**Appendix (18):** <sup>13</sup>C NMR spectrum of compound **10d** (DMSO-*d*<sub>6</sub>, 100 MHz).

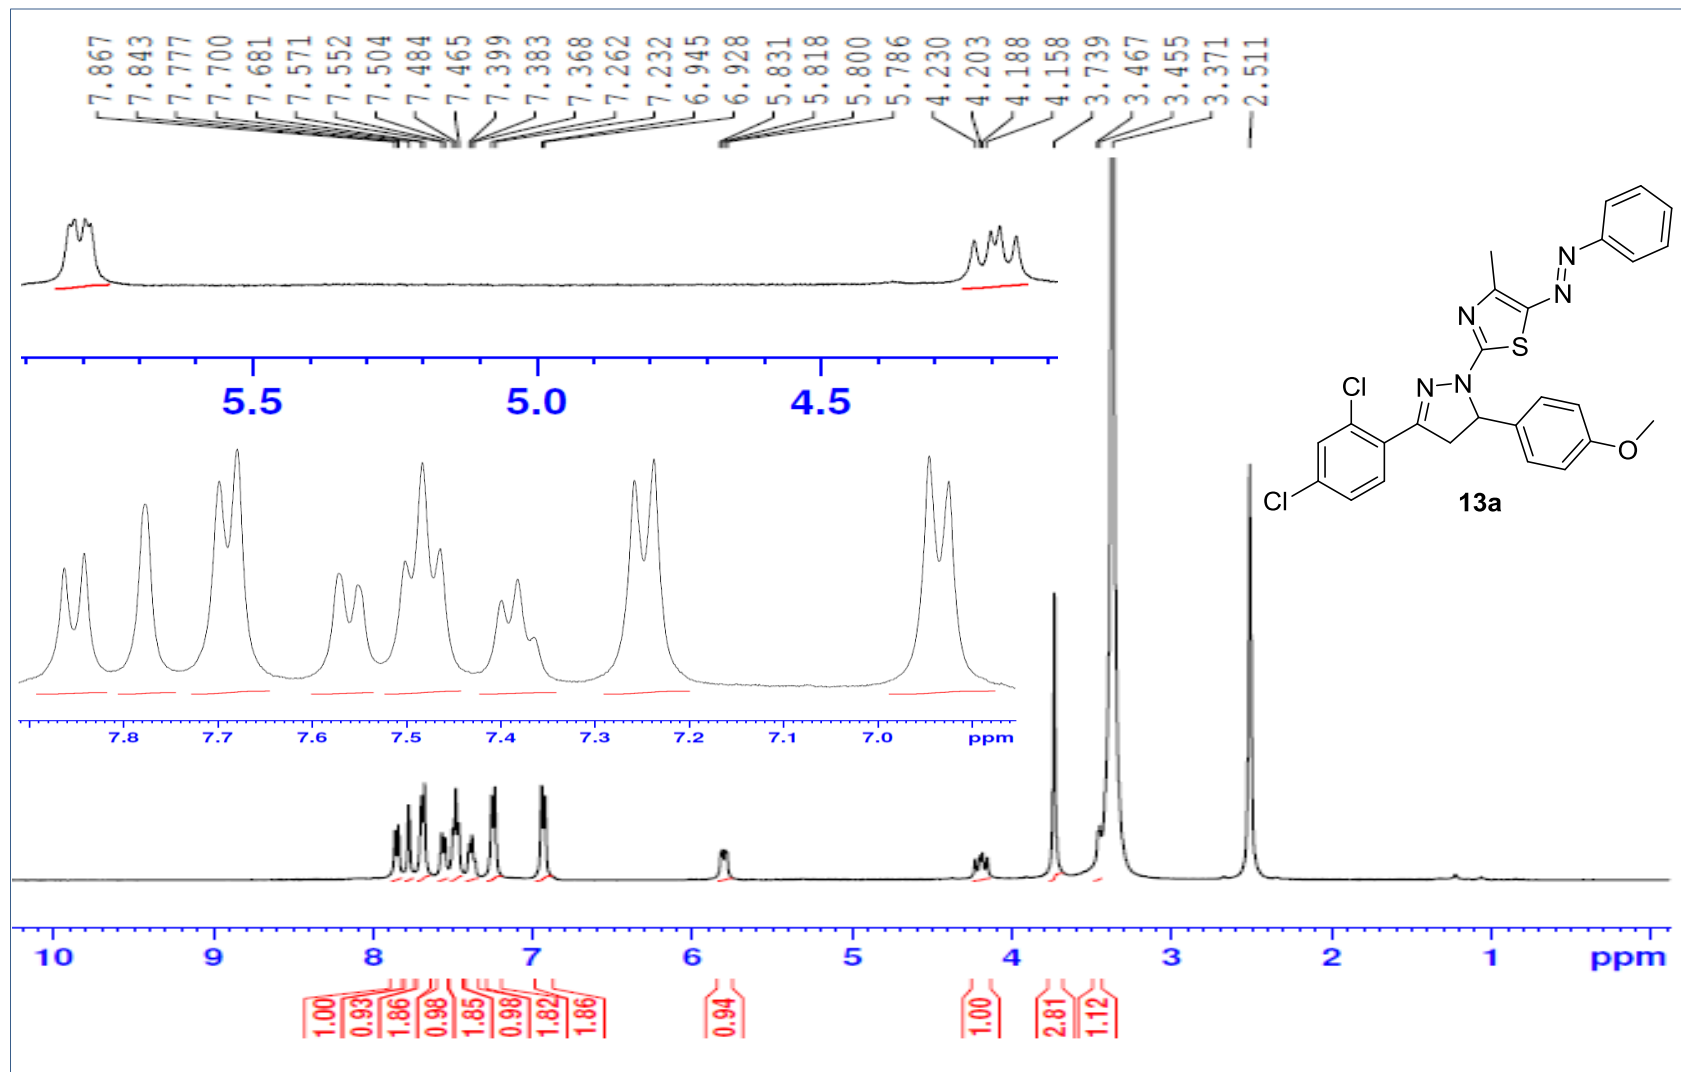

**Appendix (19):**  $^1\text{H}$  NMR spectrum of compound **13a** ( $\text{DMSO-}d_6$ , 400 MHz).

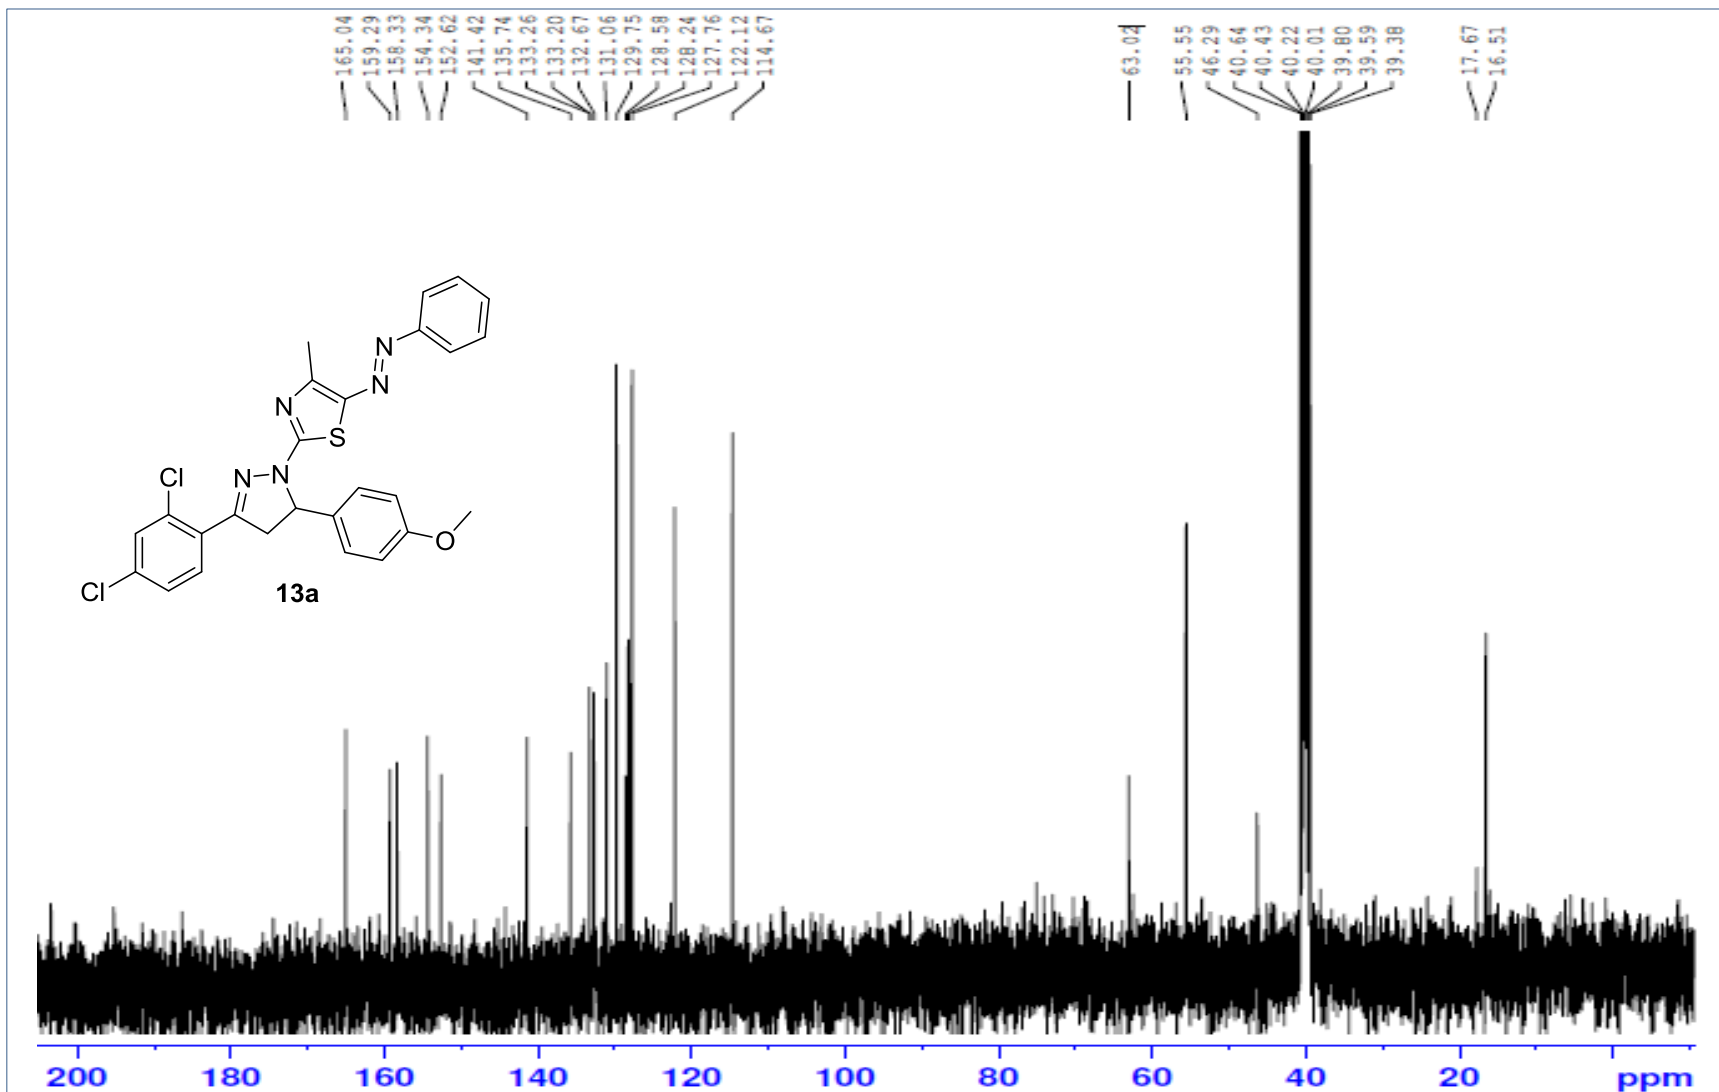

**Appendix (20):** <sup>13</sup>C NMR spectrum of compound **13a** (DMSO-*d*<sub>6</sub>, 100 MHz).

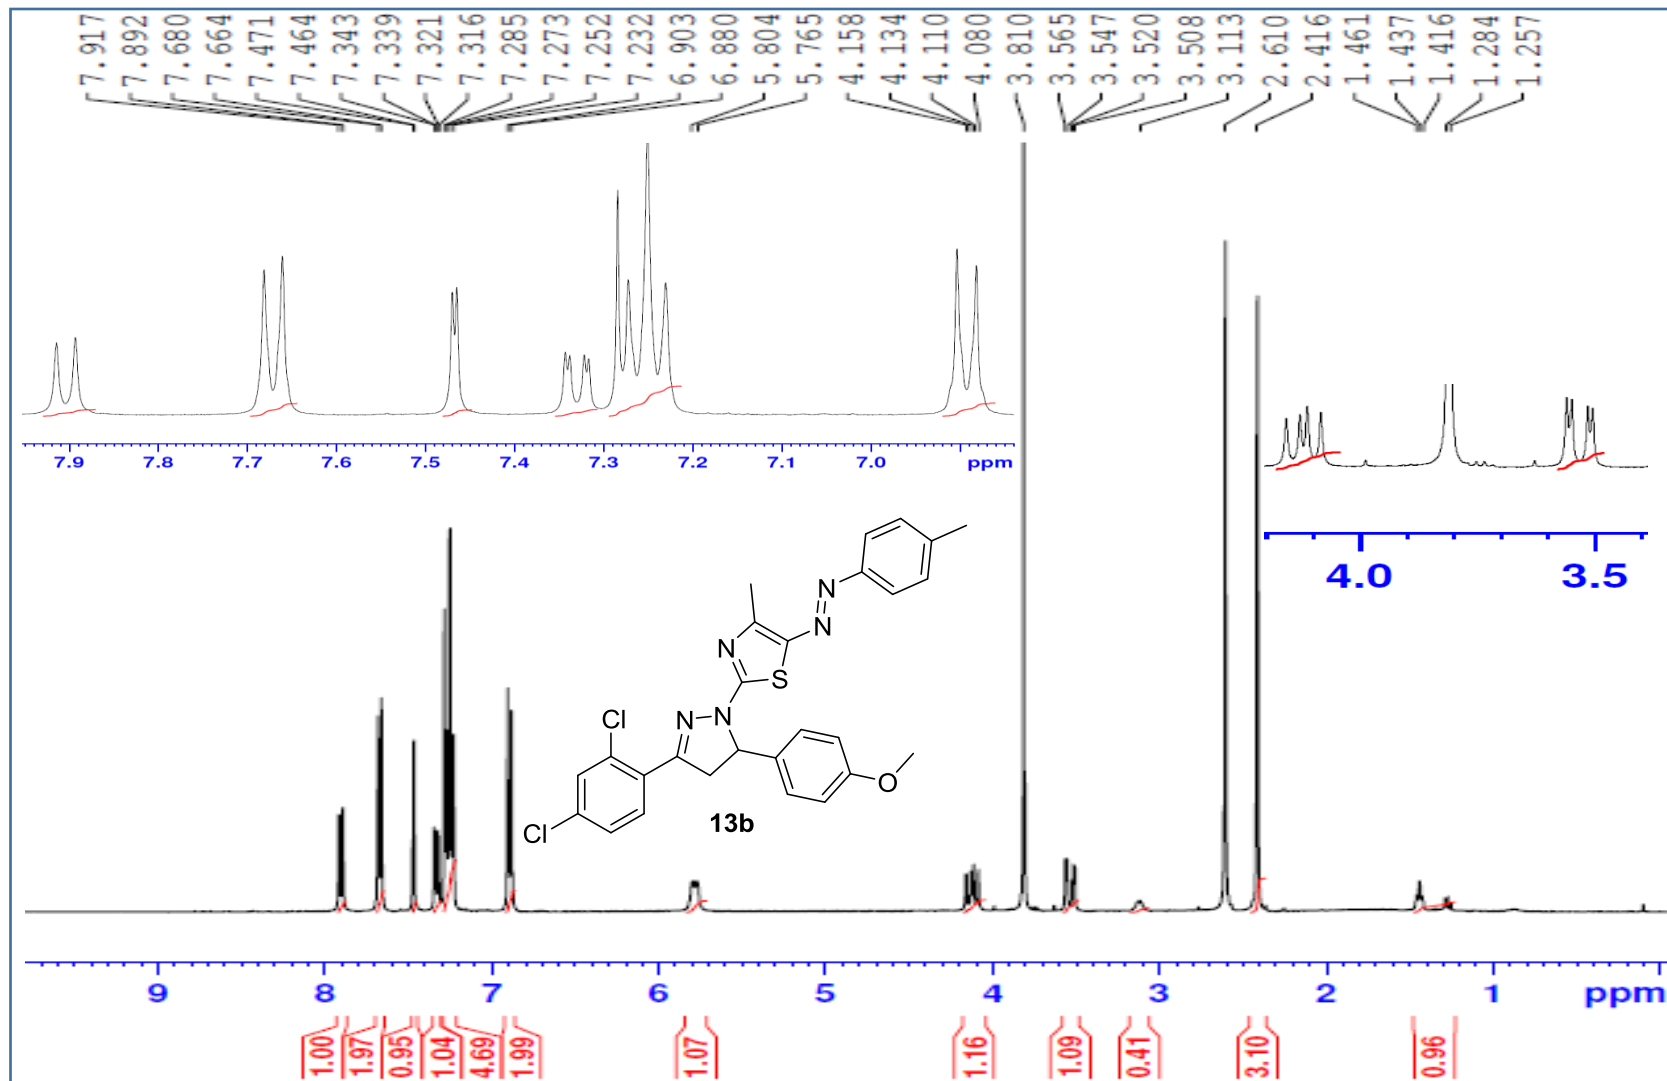

Appendix (21):  $^1\text{H}$  NMR spectrum of compound **13b** ( $\text{CDCl}_3$ , 400 MHz).

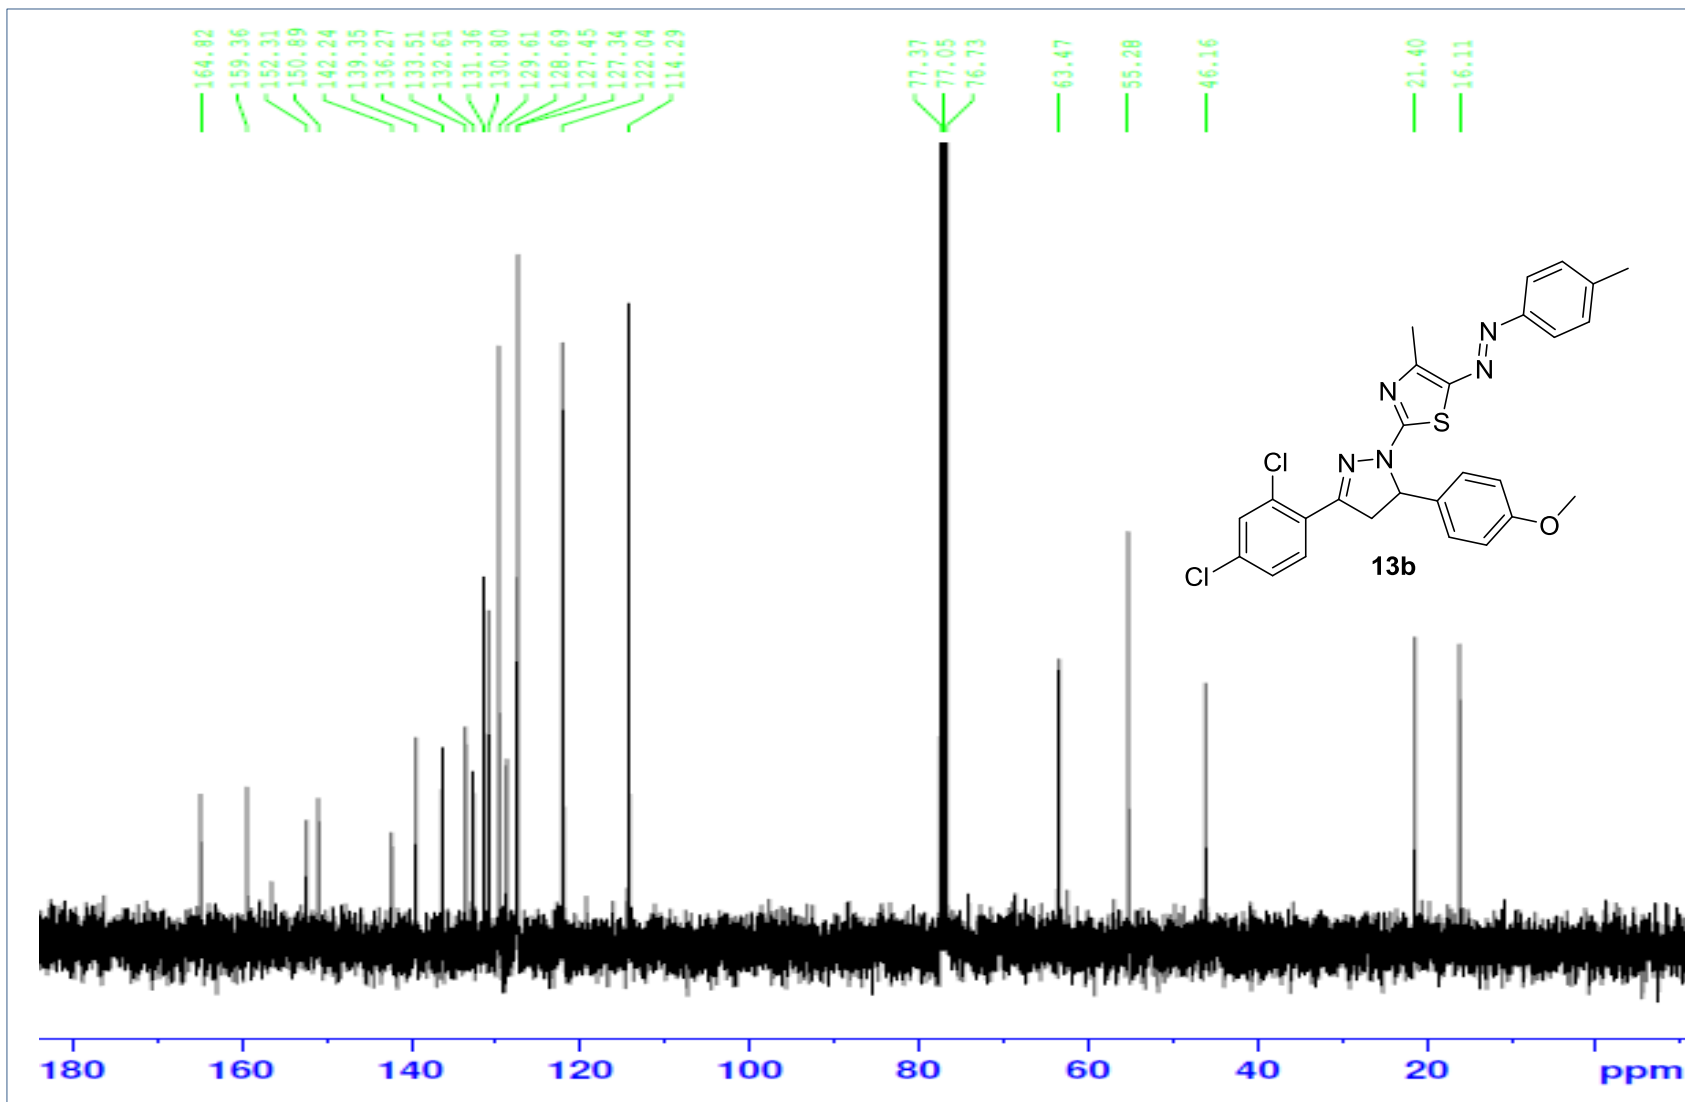

Appendix (22):  $^{13}\text{C}$  NMR spectrum of compound **13b** ( $\text{CDCl}_3$ , 100 MHz).

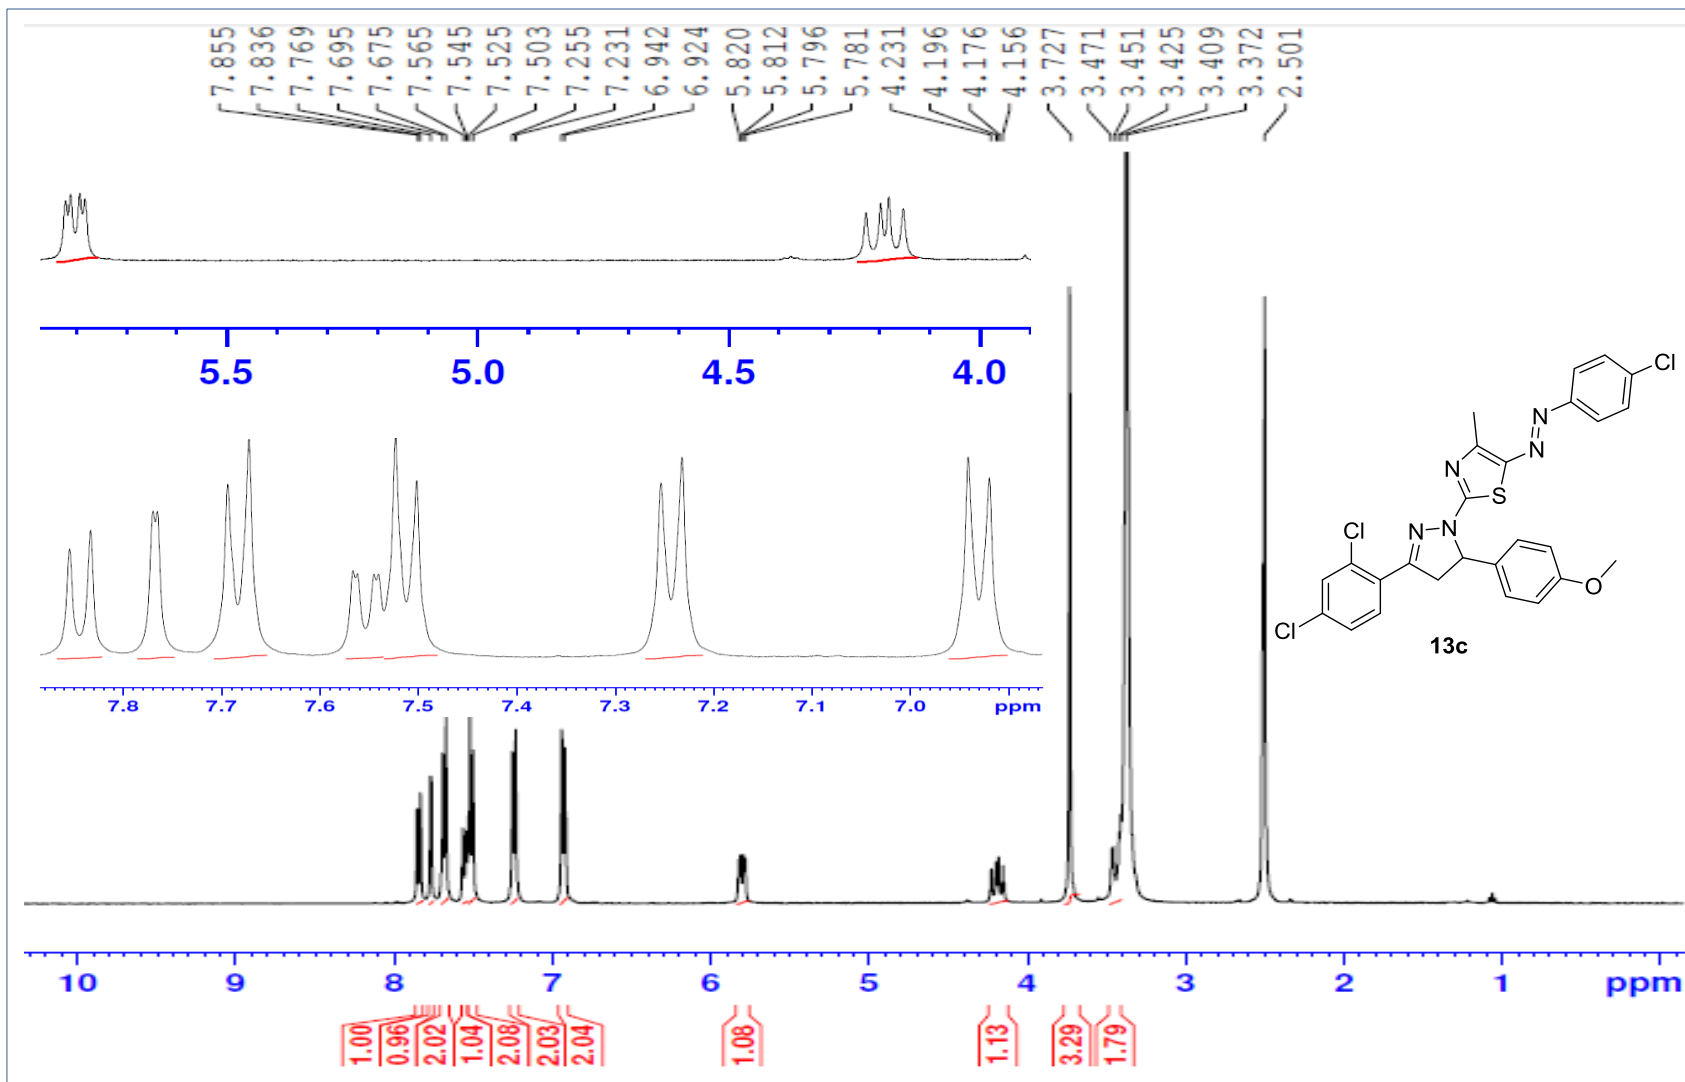

Appendix (23): <sup>1</sup>H NMR spectrum of compound **13c** (DMSO-*d*<sub>6</sub>, 400 MHz).

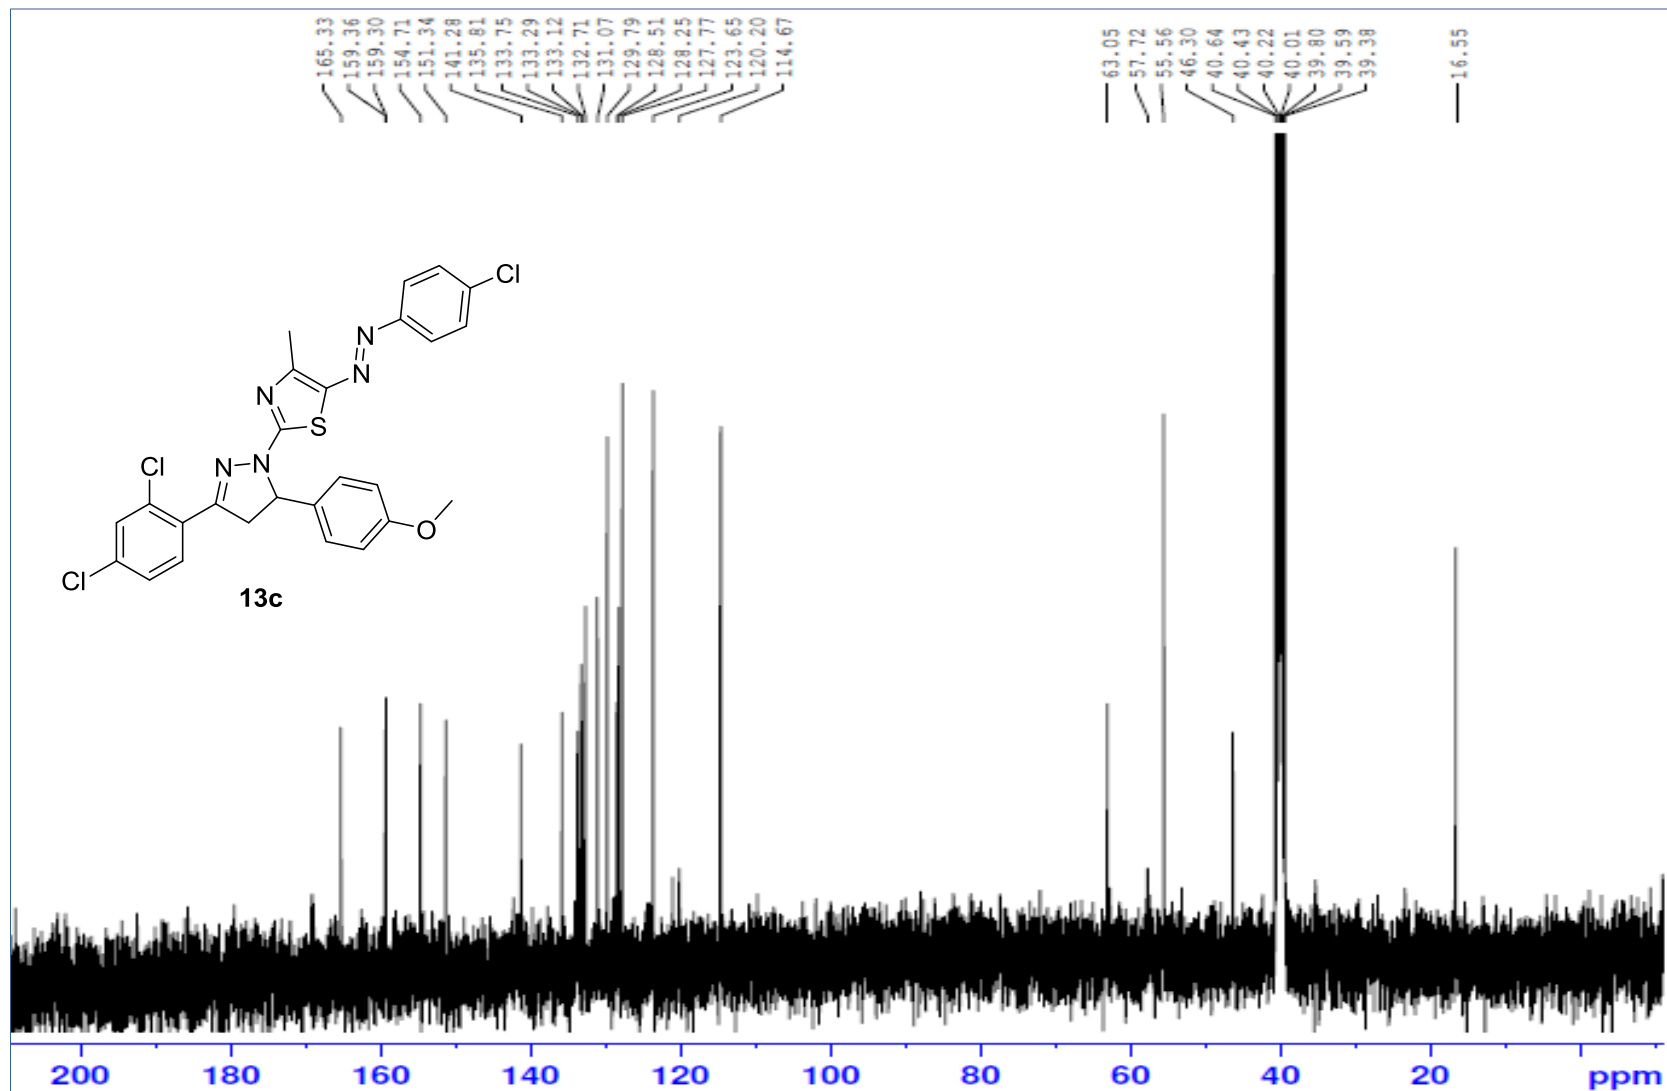

Appendix (24):  $^{13}\text{C}$  NMR spectrum of compound **13c** (DMSO- $d_6$ , 100 MHz).



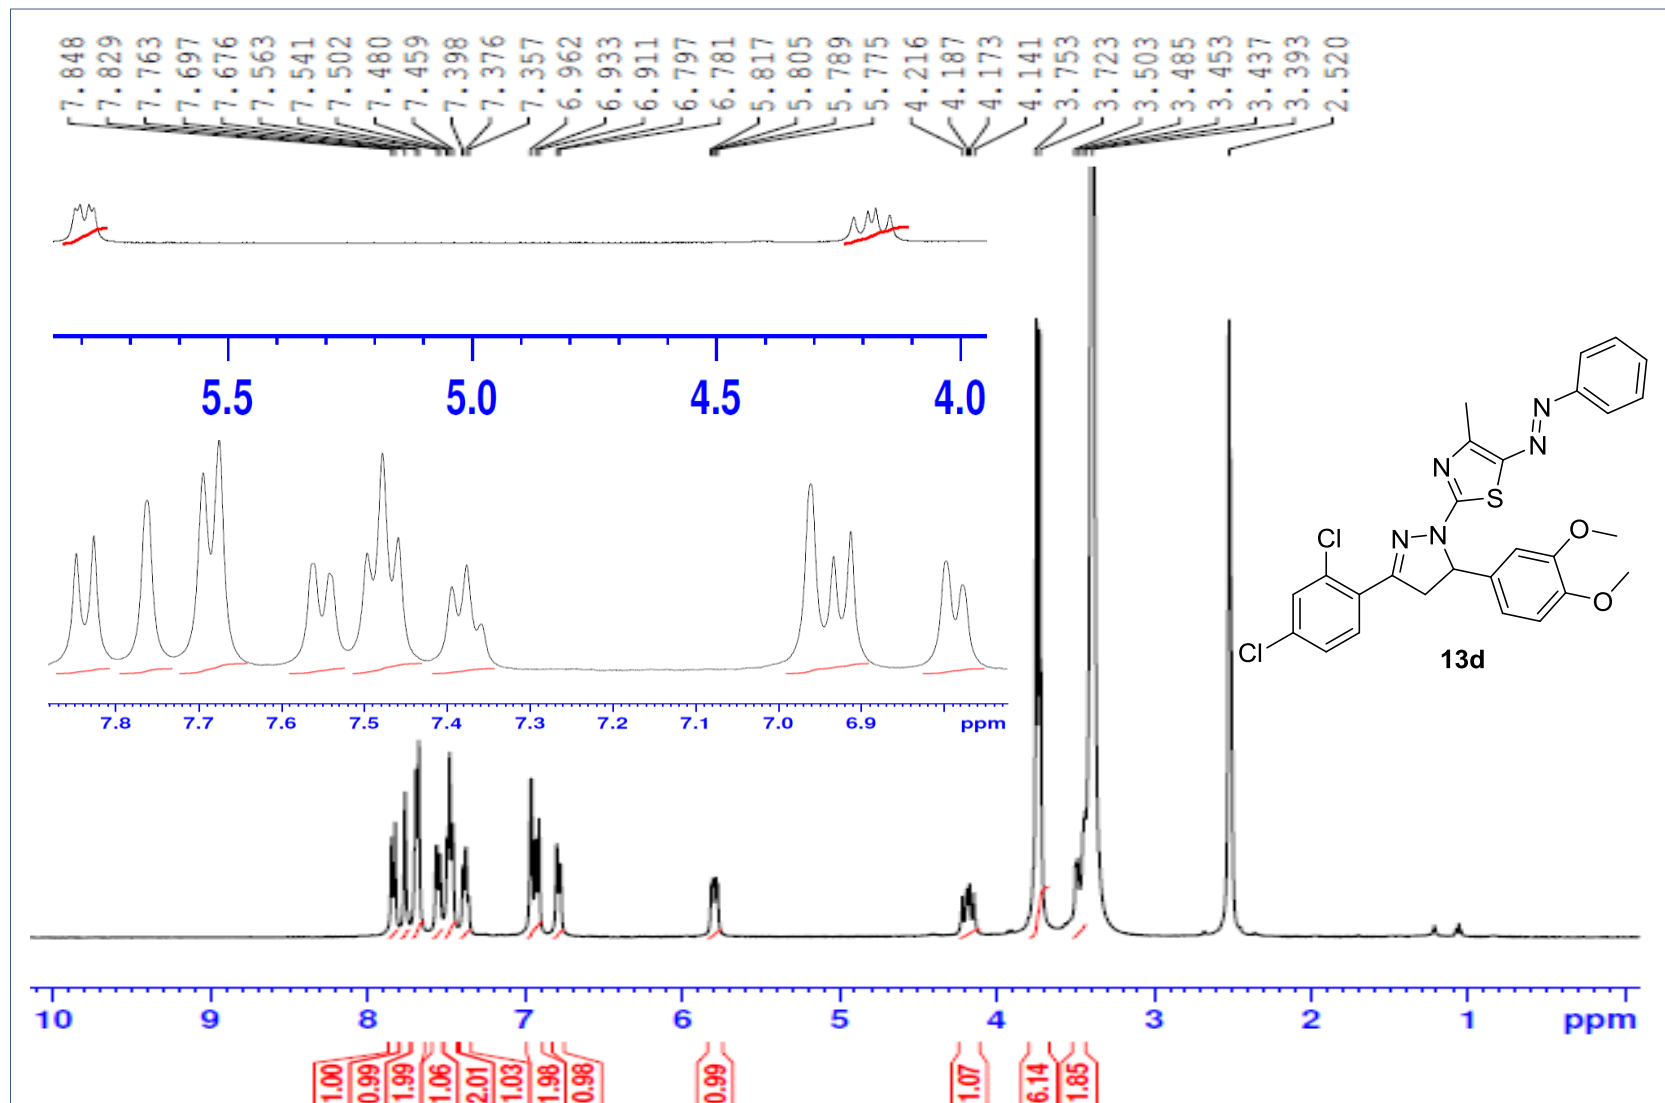

Appendix (25): <sup>1</sup>H NMR spectrum of compound **13d** (DMSO-*d*<sub>6</sub>, 400 MHz).

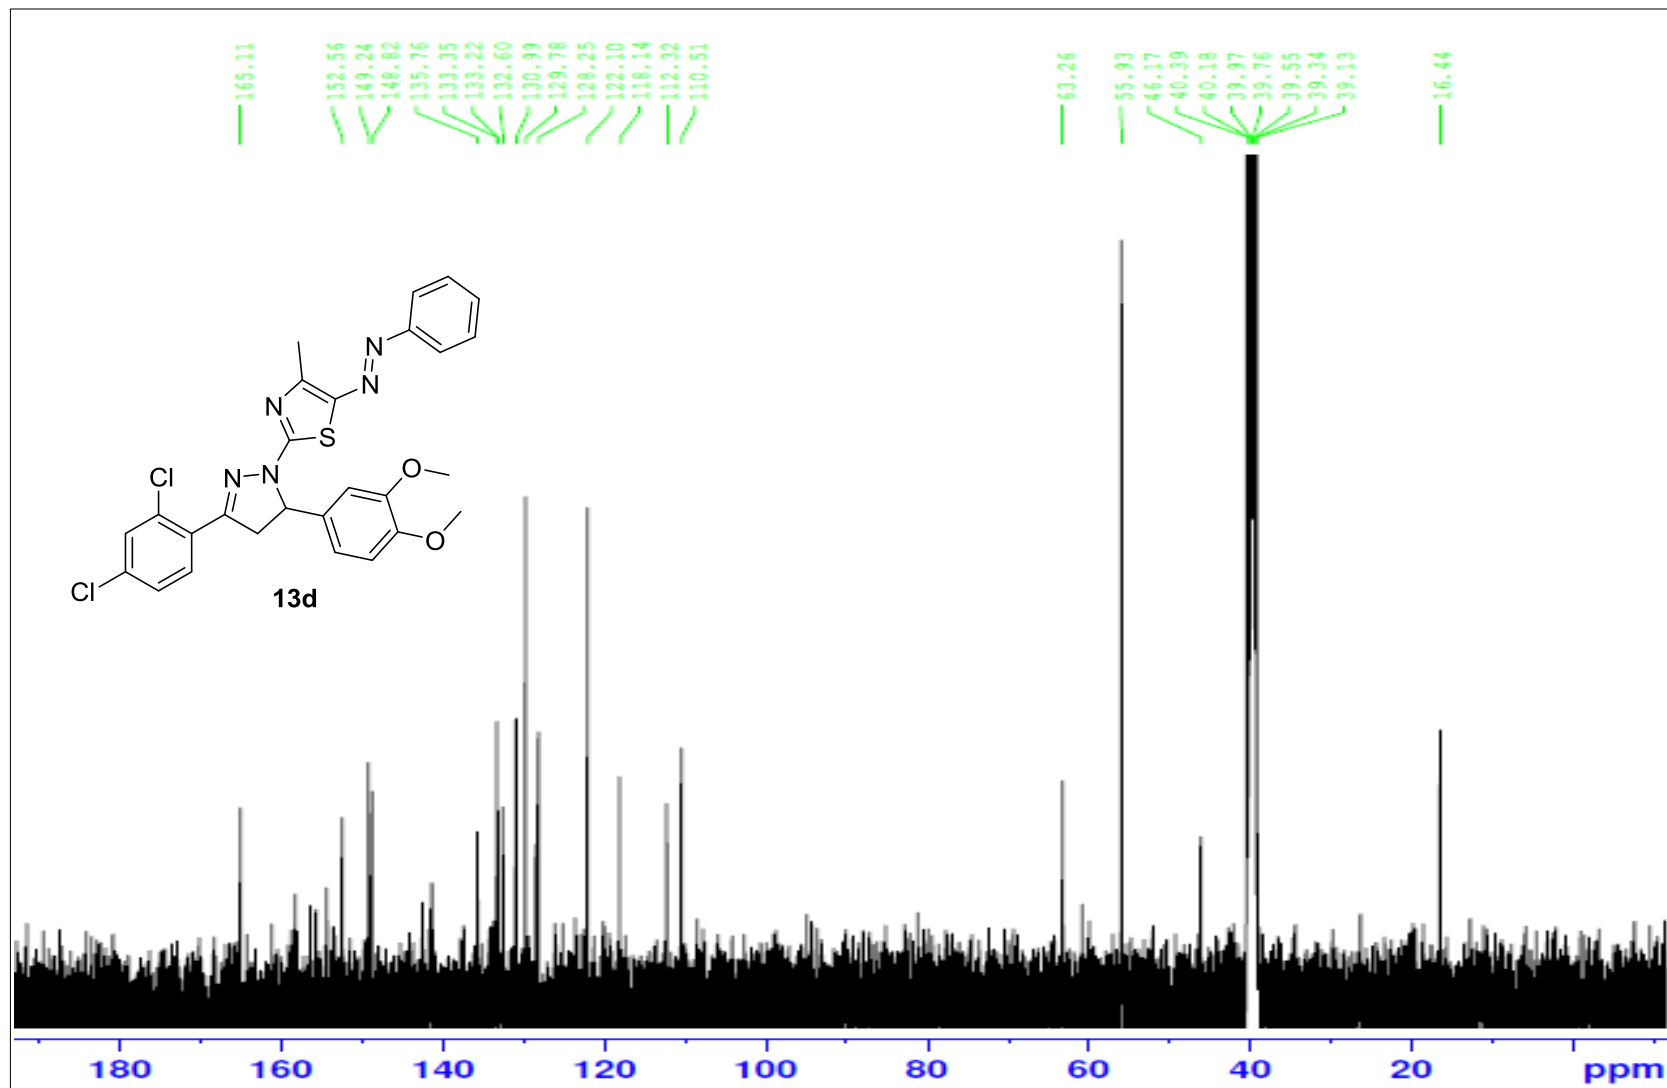

**Appendix (26):**  $^{13}\text{C}$  NMR spectrum of compound **13d** (DMSO- $d_6$ , 100 MHz).

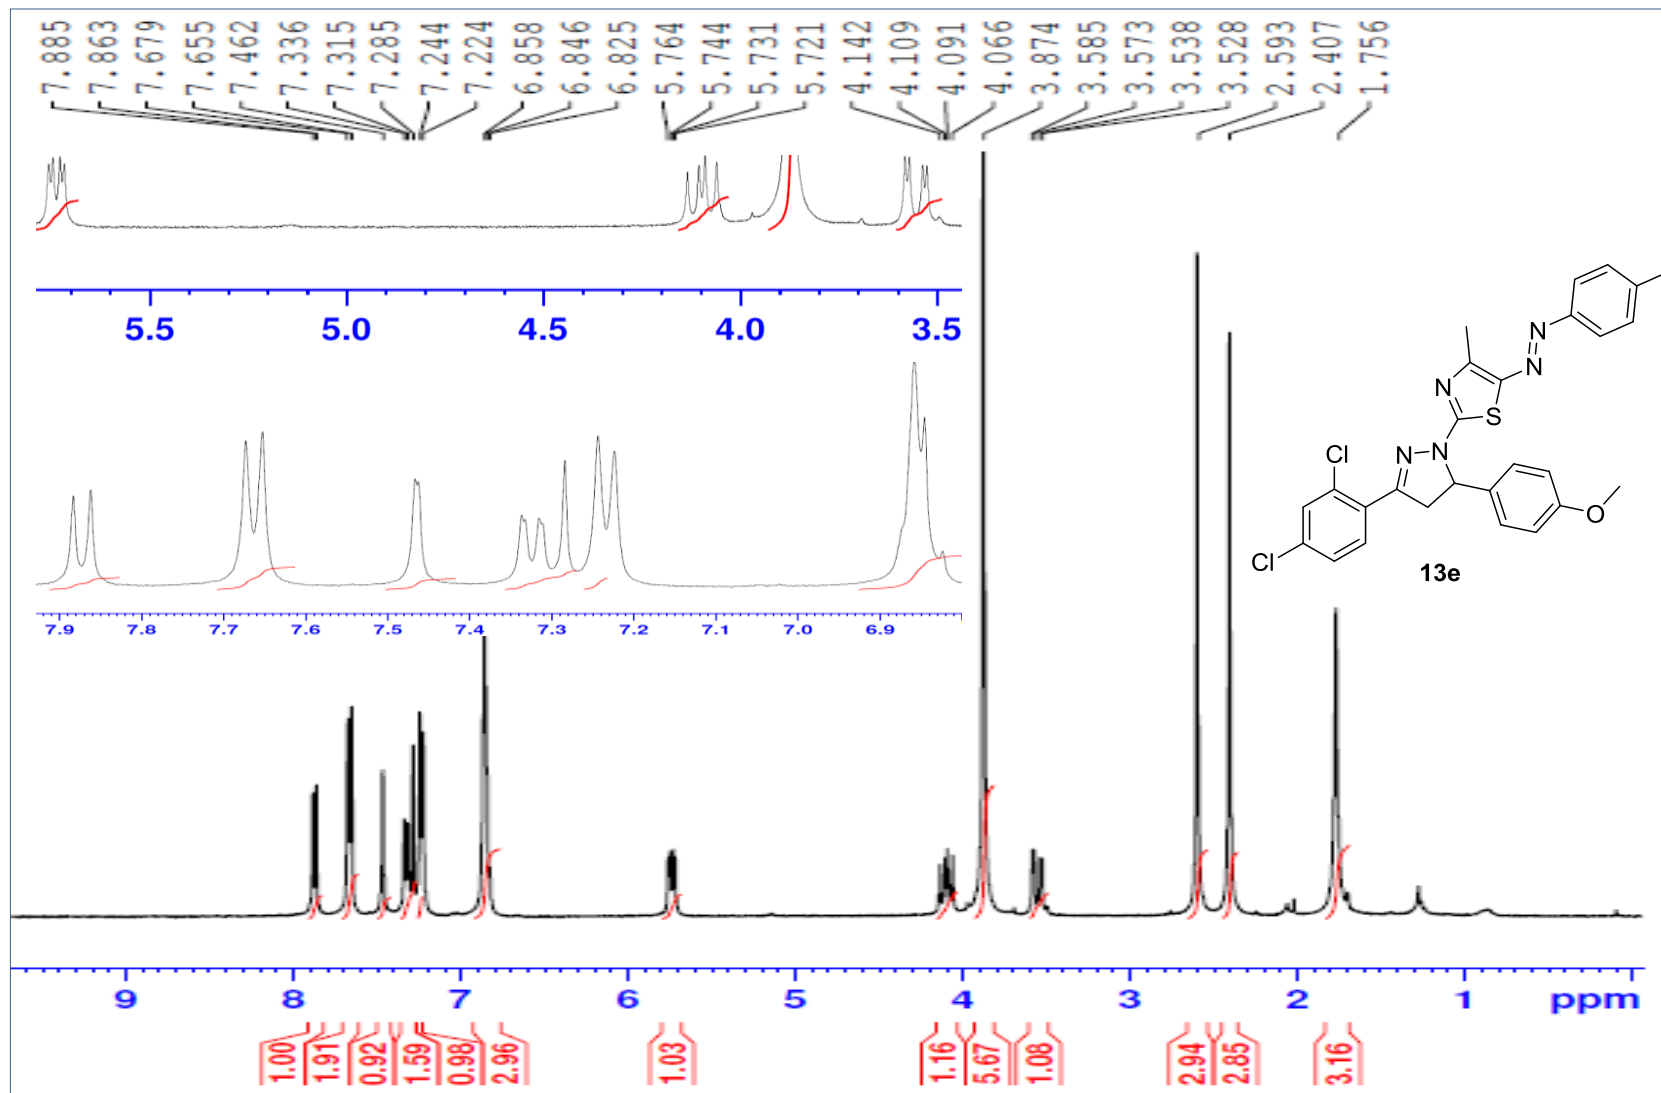

Appendix (27): <sup>1</sup>H NMR spectrum of compound **13e** (CDCl<sub>3</sub>, 400 MHz).

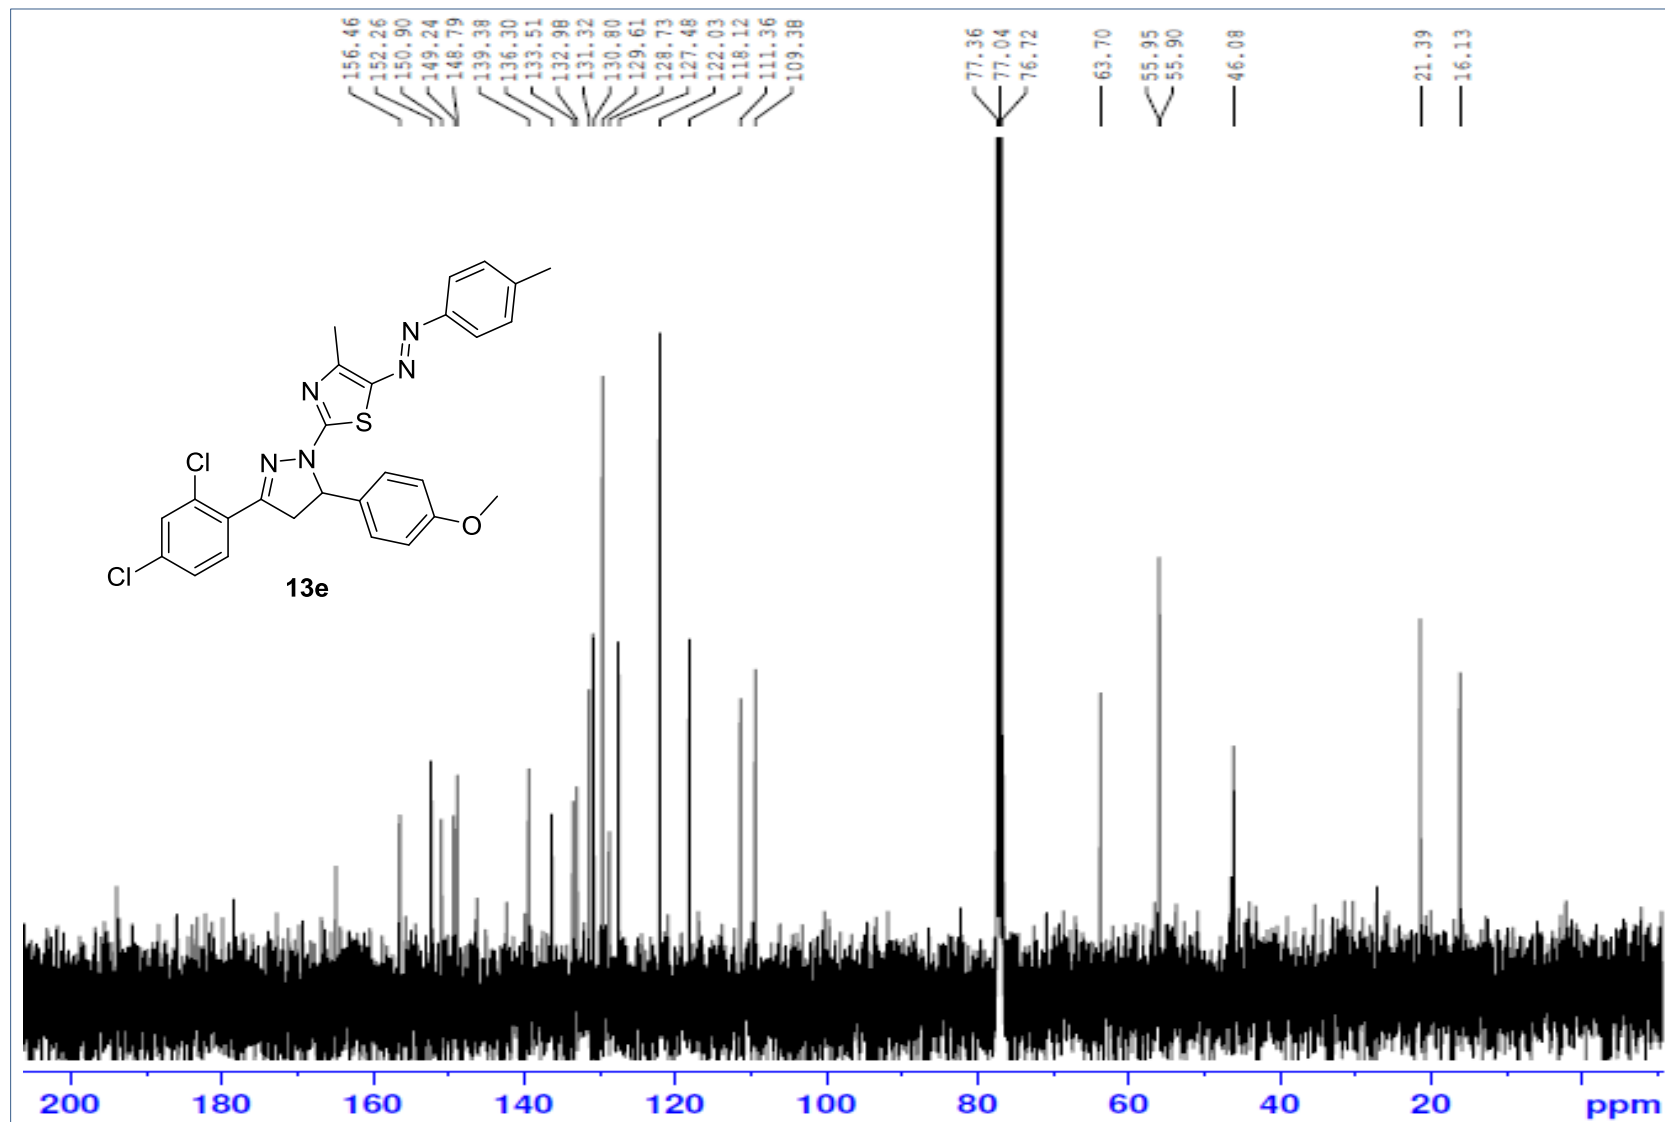

Appendix (28):  $^{13}\text{C}$  NMR spectrum of compound **13e** ( $\text{CDCl}_3$ , 100 MHz).

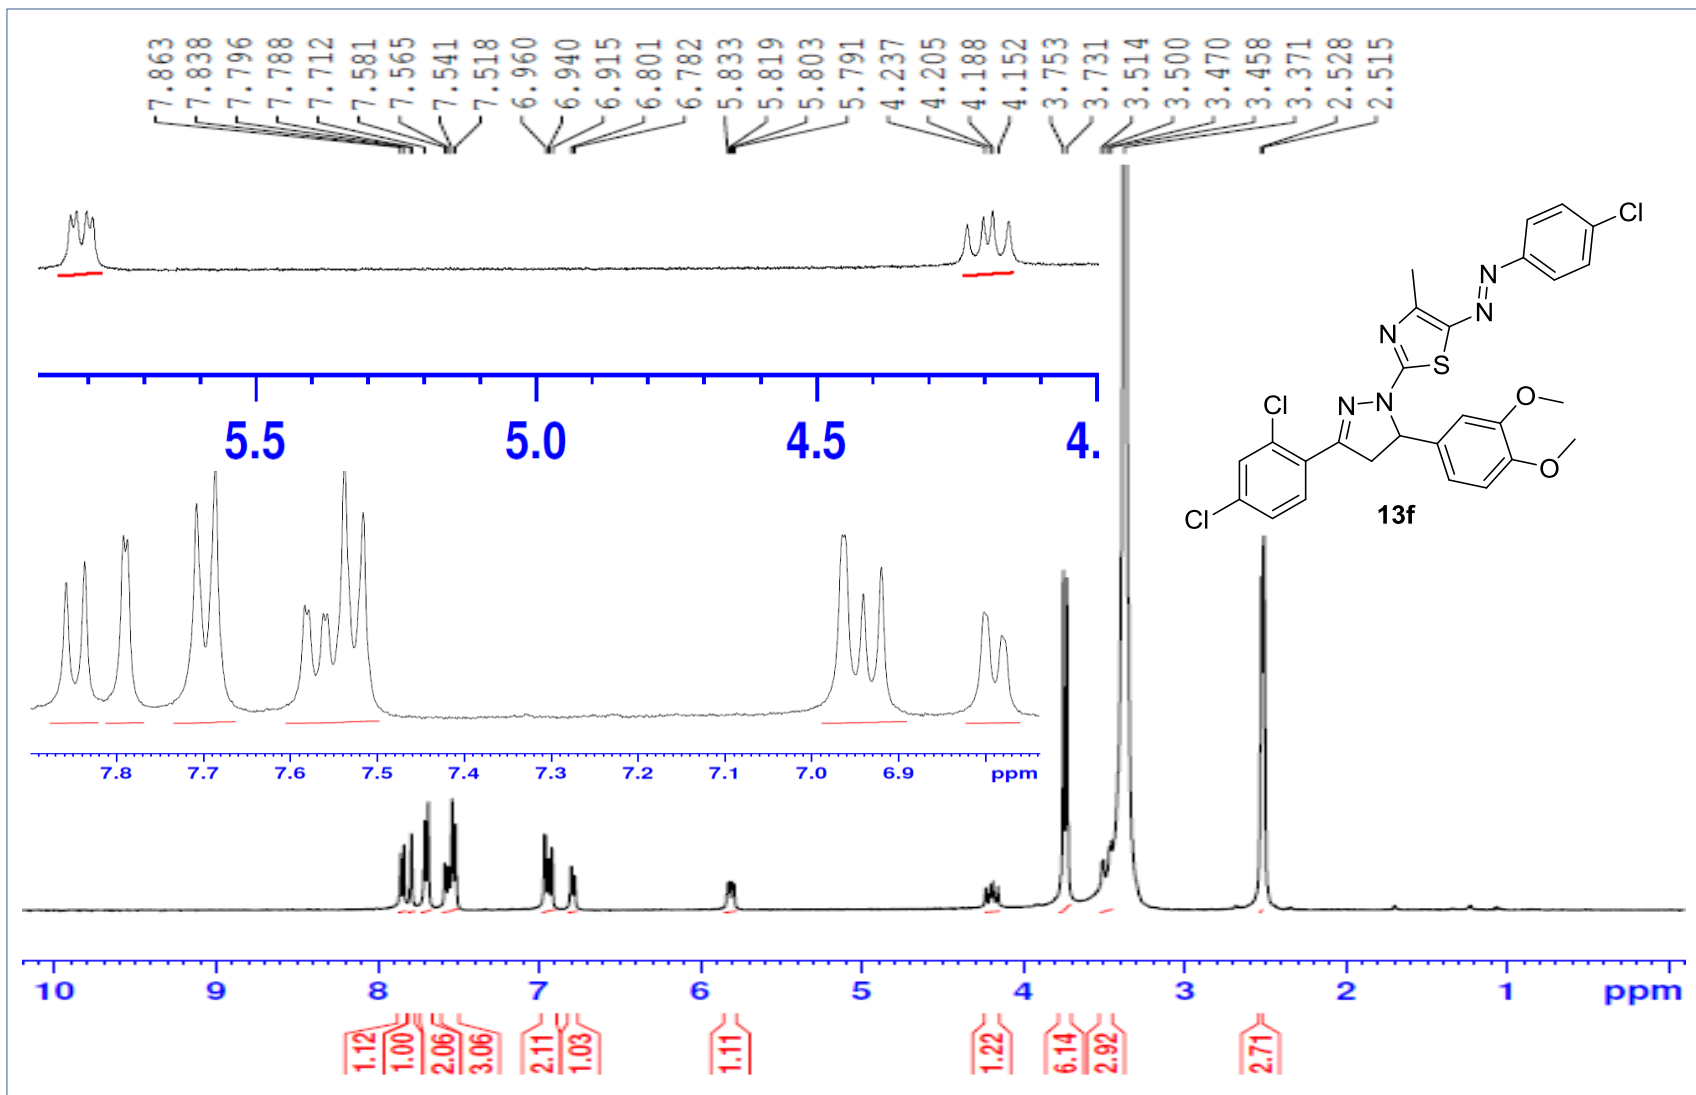

Appendix (29):  $^1\text{H NMR}$  spectrum of compound **13f** (DMSO- $d_6$ , 400 MHz).
